# Supplementary material for: Social Class and Income Inequality is Associated with Morality: Empirical Evidence from 67 Countries
Source: Research Square preprint supplement (doi:10.21203/rs.3.rs-1082570/v1), 2021-12-01
Supplement: Supplementary file 2 [file 54624891ace0c707d2706512.docx]

**Supplementary Information**

*Social Class and Inequality is Associated with Morality: Evidence from 67 countries*

**Table of Contents**

[1. Multilevel Correlations 2](#_Toc85036021)

[1.1. Country-level correlations 2](#_Toc85036022)

[1.1.1. Table S1 2](#_Toc85036023)

[1.2. Region-level correlations 18](#_Toc85036024)

[1.2.1. Table S2 18](#_Toc85036025)

[2. Linear Mixed Effects Models [Imputed Data] 20](#_Toc85036026)

[2.1. All models 20](#_Toc85036027)

[2.1.1. Table S3 20](#_Toc85036028)

[3. Nested Ordinary Least Squares Regression Results 22](#_Toc85036029)

[3.1. Moral Identity 22](#_Toc85036030)

[3.1.1. Table S4 22](#_Toc85036031)

[3.1.2. Figure S1 24](#_Toc85036032)

[3.2. Morality-as-Cooperation 25](#_Toc85036033)

[3.2.1. Table S5 25](#_Toc85036034)

[3.2.1. Figure S2 27](#_Toc85036035)

[3.3 Moral Circle 28](#_Toc85036036)

[3.3.1. Table S6 28](#_Toc85036037)

[3.3.2. Figure S3 30](#_Toc85036038)

[3.4. Prosocial Behaviour 31](#_Toc85036039)

[3.3.1. Table S7 31](#_Toc85036040)

[3.3.2. Figure S4 33](#_Toc85036041)

[4. Cross Validations 34](#_Toc85036042)

[4.1. All models 34](#_Toc85036043)

[4.1.1. Table S8 34](#_Toc85036044)

# 1. Multilevel Correlations

## 1.1. Country-level correlations

### 1.1.1. Table S1

| **Table S1 | Country-level correlations** | | | | | | | | |
| --- | --- | --- | --- | --- | --- | --- | --- | --- |
| **Country** | **X** | **Y** | **r** | **95% CI Low** | **95% CI High** | **t** | **p** | **N** |
| Argentina | SES | MI | -0.050 | -0.124 | 0.024 | -1.327 | 1.000 | 698 |
| Argentina | SES | MAC | 0.007 | -0.067 | 0.081 | 0.188 | 1.000 | 698 |
| Argentina | SES | MC | -0.010 | -0.084 | 0.065 | -0.251 | 1.000 | 698 |
| Argentina | SES | PB | -0.062 | -0.136 | 0.012 | -1.640 | 0.711 | 698 |
| Argentina | MI | MAC | 0.155 | 0.081 | 0.226 | 4.128 | 0.000 | 698 |
| Argentina | MI | MC | 0.134 | 0.061 | 0.206 | 3.571 | 0.003 | 698 |
| Argentina | MI | PB | -0.023 | -0.097 | 0.052 | -0.602 | 1.000 | 698 |
| Argentina | MAC | MC | 0.043 | -0.032 | 0.117 | 1.130 | 1.000 | 698 |
| Argentina | MAC | PB | 0.044 | -0.030 | 0.118 | 1.174 | 1.000 | 698 |
| Argentina | MC | PB | 0.175 | 0.102 | 0.246 | 4.697 | 0.000 | 698 |
| Australia | SES | MI | -0.292 | -0.330 | -0.252 | -14.061 | 0.000 | 2128 |
| Australia | SES | MAC | -0.188 | -0.228 | -0.146 | -8.820 | 0.000 | 2136 |
| Australia | SES | MC | 0.026 | -0.016 | 0.068 | 1.200 | 0.330 | 2140 |
| Australia | SES | PB | -0.132 | -0.173 | -0.090 | -6.155 | 0.000 | 2140 |
| Australia | MI | MAC | 0.432 | 0.397 | 0.466 | 22.061 | 0.000 | 2126 |
| Australia | MI | MC | 0.030 | -0.012 | 0.072 | 1.388 | 0.330 | 2128 |
| Australia | MI | PB | 0.160 | 0.118 | 0.201 | 7.468 | 0.000 | 2129 |
| Australia | MAC | MC | 0.044 | 0.001 | 0.086 | 2.030 | 0.128 | 2136 |
| Australia | MAC | PB | 0.121 | 0.079 | 0.163 | 5.636 | 0.000 | 2136 |
| Australia | MC | PB | 0.076 | 0.034 | 0.118 | 3.515 | 0.002 | 2140 |
| Austria | SES | MI | -0.030 | -0.083 | 0.024 | -1.082 | 0.773 | 1336 |
| Austria | SES | MAC | 0.031 | -0.023 | 0.084 | 1.132 | 0.773 | 1348 |
| Austria | SES | MC | 0.055 | 0.002 | 0.108 | 2.031 | 0.170 | 1367 |
| Austria | SES | PB | -0.105 | -0.157 | -0.053 | -3.930 | 0.001 | 1384 |
| Austria | MI | MAC | 0.217 | 0.165 | 0.268 | 8.067 | 0.000 | 1317 |
| Austria | MI | MC | 0.175 | 0.123 | 0.227 | 6.478 | 0.000 | 1326 |
| Austria | MI | PB | 0.094 | 0.041 | 0.147 | 3.459 | 0.003 | 1339 |
| Austria | MAC | MC | 0.083 | 0.029 | 0.136 | 3.033 | 0.012 | 1336 |
| Austria | MAC | PB | 0.028 | -0.026 | 0.081 | 1.012 | 0.773 | 1353 |
| Austria | MC | PB | 0.209 | 0.158 | 0.259 | 7.901 | 0.000 | 1370 |
| Bangladesh | SES | MI | -0.159 | -0.257 | -0.058 | -3.090 | 0.016 | 368 |
| Bangladesh | SES | MAC | -0.133 | -0.232 | -0.031 | -2.570 | 0.041 | 368 |
| Bangladesh | SES | MC | 0.159 | 0.059 | 0.256 | 3.116 | 0.016 | 376 |
| Bangladesh | SES | PB | 0.222 | 0.124 | 0.316 | 4.406 | 0.000 | 376 |
| Bangladesh | MI | MAC | 0.153 | 0.051 | 0.251 | 2.954 | 0.020 | 368 |
| Bangladesh | MI | MC | -0.142 | -0.240 | -0.040 | -2.746 | 0.032 | 371 |
| Bangladesh | MI | PB | -0.133 | -0.231 | -0.032 | -2.578 | 0.041 | 372 |
| Bangladesh | MAC | MC | -0.111 | -0.210 | -0.009 | -2.139 | 0.066 | 371 |
| Bangladesh | MAC | PB | -0.007 | -0.108 | 0.094 | -0.134 | 0.893 | 376 |
| Bangladesh | MC | PB | 0.169 | 0.069 | 0.265 | 3.325 | 0.009 | 380 |
| Belgium | SES | MI | -0.056 | -0.114 | 0.003 | -1.874 | 0.245 | 1126 |
| Belgium | SES | MAC | -0.029 | -0.088 | 0.029 | -0.990 | 0.645 | 1133 |
| Belgium | SES | MC | 0.063 | 0.005 | 0.121 | 2.134 | 0.165 | 1143 |
| Belgium | SES | PB | -0.055 | -0.112 | 0.003 | -1.862 | 0.245 | 1153 |
| Belgium | MI | MAC | 0.150 | 0.092 | 0.207 | 5.038 | 0.000 | 1111 |
| Belgium | MI | MC | 0.148 | 0.090 | 0.205 | 5.007 | 0.000 | 1116 |
| Belgium | MI | PB | 0.128 | 0.070 | 0.185 | 4.339 | 0.000 | 1126 |
| Belgium | MAC | MC | 0.094 | 0.036 | 0.152 | 3.171 | 0.009 | 1123 |
| Belgium | MAC | PB | 0.022 | -0.036 | 0.080 | 0.746 | 0.645 | 1133 |
| Belgium | MC | PB | 0.124 | 0.067 | 0.181 | 4.233 | 0.000 | 1143 |
| Bolivia | SES | MI | -0.354 | -0.615 | -0.023 | -2.173 | 0.361 | 35 |
| Bolivia | SES | MAC | -0.127 | -0.441 | 0.216 | -0.734 | 1.000 | 35 |
| Bolivia | SES | MC | 0.240 | -0.101 | 0.531 | 1.422 | 1.000 | 35 |
| Bolivia | SES | PB | 0.128 | -0.215 | 0.442 | 0.741 | 1.000 | 35 |
| Bolivia | MI | MAC | 0.050 | -0.288 | 0.377 | 0.289 | 1.000 | 35 |
| Bolivia | MI | MC | -0.079 | -0.401 | 0.262 | -0.452 | 1.000 | 35 |
| Bolivia | MI | PB | 0.108 | -0.233 | 0.426 | 0.626 | 1.000 | 35 |
| Bolivia | MAC | MC | 0.107 | -0.235 | 0.425 | 0.617 | 1.000 | 35 |
| Bolivia | MAC | PB | 0.043 | -0.294 | 0.371 | 0.250 | 1.000 | 35 |
| Bolivia | MC | PB | 0.356 | 0.025 | 0.616 | 2.185 | 0.361 | 35 |
| Brazil | SES | MI | -0.082 | -0.128 | -0.035 | -3.444 | 0.004 | 1774 |
| Brazil | SES | MAC | -0.058 | -0.104 | -0.012 | -2.451 | 0.057 | 1782 |
| Brazil | SES | MC | 0.002 | -0.044 | 0.048 | 0.097 | 0.923 | 1803 |
| Brazil | SES | PB | -0.101 | -0.146 | -0.055 | -4.300 | 0.000 | 1804 |
| Brazil | MI | MAC | 0.223 | 0.178 | 0.267 | 9.575 | 0.000 | 1758 |
| Brazil | MI | MC | -0.027 | -0.073 | 0.020 | -1.134 | 0.514 | 1773 |
| Brazil | MI | PB | 0.061 | 0.014 | 0.107 | 2.566 | 0.052 | 1774 |
| Brazil | MAC | MC | 0.085 | 0.038 | 0.130 | 3.579 | 0.002 | 1782 |
| Brazil | MAC | PB | 0.049 | 0.003 | 0.095 | 2.069 | 0.116 | 1784 |
| Brazil | MC | PB | 0.140 | 0.094 | 0.185 | 5.999 | 0.000 | 1804 |
| Bulgaria | SES | MI | -0.133 | -0.219 | -0.045 | -2.974 | 0.025 | 493 |
| Bulgaria | SES | MAC | 0.003 | -0.085 | 0.091 | 0.063 | 1.000 | 499 |
| Bulgaria | SES | MC | 0.009 | -0.080 | 0.097 | 0.192 | 1.000 | 491 |
| Bulgaria | SES | PB | -0.091 | -0.177 | -0.003 | -2.040 | 0.251 | 500 |
| Bulgaria | MI | MAC | 0.202 | 0.116 | 0.286 | 4.573 | 0.000 | 492 |
| Bulgaria | MI | MC | 0.027 | -0.062 | 0.116 | 0.591 | 1.000 | 485 |
| Bulgaria | MI | PB | 0.139 | 0.052 | 0.225 | 3.116 | 0.017 | 493 |
| Bulgaria | MAC | MC | 0.027 | -0.062 | 0.116 | 0.601 | 1.000 | 490 |
| Bulgaria | MAC | PB | 0.097 | 0.009 | 0.183 | 2.171 | 0.213 | 499 |
| Bulgaria | MC | PB | 0.056 | -0.033 | 0.144 | 1.235 | 1.000 | 491 |
| Canada | SES | MI | -0.162 | -0.225 | -0.097 | -4.897 | 0.000 | 894 |
| Canada | SES | MAC | -0.077 | -0.142 | -0.012 | -2.321 | 0.062 | 897 |
| Canada | SES | MC | 0.030 | -0.035 | 0.095 | 0.904 | 0.366 | 901 |
| Canada | SES | PB | -0.084 | -0.148 | -0.019 | -2.521 | 0.048 | 901 |
| Canada | MI | MAC | 0.292 | 0.231 | 0.351 | 9.099 | 0.000 | 891 |
| Canada | MI | MC | 0.115 | 0.050 | 0.179 | 3.458 | 0.004 | 894 |
| Canada | MI | PB | 0.164 | 0.100 | 0.227 | 4.968 | 0.000 | 894 |
| Canada | MAC | MC | 0.092 | 0.027 | 0.157 | 2.770 | 0.029 | 897 |
| Canada | MAC | PB | 0.059 | -0.006 | 0.124 | 1.778 | 0.152 | 897 |
| Canada | MC | PB | 0.114 | 0.049 | 0.178 | 3.441 | 0.004 | 901 |
| Chile | SES | MI | 0.001 | -0.203 | 0.204 | 0.006 | 1.000 | 93 |
| Chile | SES | MAC | 0.055 | -0.150 | 0.256 | 0.526 | 1.000 | 93 |
| Chile | SES | MC | 0.080 | -0.126 | 0.279 | 0.764 | 1.000 | 93 |
| Chile | SES | PB | -0.147 | -0.341 | 0.058 | -1.420 | 1.000 | 93 |
| Chile | MI | MAC | 0.156 | -0.049 | 0.349 | 1.511 | 1.000 | 93 |
| Chile | MI | MC | 0.180 | -0.024 | 0.371 | 1.750 | 0.835 | 93 |
| Chile | MI | PB | 0.067 | -0.139 | 0.267 | 0.638 | 1.000 | 93 |
| Chile | MAC | MC | -0.033 | -0.235 | 0.172 | -0.314 | 1.000 | 93 |
| Chile | MAC | PB | -0.102 | -0.299 | 0.104 | -0.977 | 1.000 | 93 |
| Chile | MC | PB | -0.154 | -0.347 | 0.051 | -1.489 | 1.000 | 93 |
| China | SES | MI | -0.041 | -0.102 | 0.020 | -1.306 | 1.000 | 1030 |
| China | SES | MAC | 0.006 | -0.055 | 0.067 | 0.197 | 1.000 | 1030 |
| China | SES | MC | -0.027 | -0.088 | 0.034 | -0.881 | 1.000 | 1030 |
| China | SES | PB | 0.050 | -0.012 | 0.110 | 1.591 | 0.783 | 1030 |
| China | MI | MAC | 0.379 | 0.325 | 0.430 | 13.116 | 0.000 | 1030 |
| China | MI | MC | 0.088 | 0.027 | 0.148 | 2.821 | 0.043 | 1030 |
| China | MI | PB | 0.026 | -0.035 | 0.087 | 0.823 | 1.000 | 1030 |
| China | MAC | MC | 0.041 | -0.020 | 0.102 | 1.308 | 1.000 | 1030 |
| China | MAC | PB | 0.036 | -0.025 | 0.097 | 1.151 | 1.000 | 1030 |
| China | MC | PB | 0.088 | 0.027 | 0.148 | 2.826 | 0.043 | 1030 |
| Colombia | SES | MI | -0.092 | -0.148 | -0.035 | -3.155 | 0.010 | 1177 |
| Colombia | SES | MAC | -0.033 | -0.093 | 0.028 | -1.061 | 1.000 | 1046 |
| Colombia | SES | MC | 0.013 | -0.044 | 0.069 | 0.436 | 1.000 | 1191 |
| Colombia | SES | PB | -0.115 | -0.171 | -0.059 | -4.030 | 0.000 | 1208 |
| Colombia | MI | MAC | 0.178 | 0.118 | 0.236 | 5.810 | 0.000 | 1033 |
| Colombia | MI | MC | 0.134 | 0.077 | 0.190 | 4.619 | 0.000 | 1164 |
| Colombia | MI | PB | 0.013 | -0.044 | 0.070 | 0.449 | 1.000 | 1178 |
| Colombia | MAC | MC | 0.059 | -0.002 | 0.120 | 1.899 | 0.289 | 1032 |
| Colombia | MAC | PB | 0.013 | -0.048 | 0.073 | 0.409 | 1.000 | 1047 |
| Colombia | MC | PB | 0.107 | 0.051 | 0.163 | 3.728 | 0.001 | 1193 |
| Costa Rica | SES | MI | -0.184 | -0.540 | 0.228 | -0.897 | 1.000 | 25 |
| Costa Rica | SES | MAC | -0.015 | -0.408 | 0.382 | -0.072 | 1.000 | 25 |
| Costa Rica | SES | MC | 0.173 | -0.238 | 0.532 | 0.843 | 1.000 | 25 |
| Costa Rica | SES | PB | 0.012 | -0.385 | 0.405 | 0.058 | 1.000 | 25 |
| Costa Rica | MI | MAC | 0.496 | 0.126 | 0.745 | 2.740 | 0.117 | 25 |
| Costa Rica | MI | MC | 0.097 | -0.310 | 0.474 | 0.465 | 1.000 | 25 |
| Costa Rica | MI | PB | 0.242 | -0.169 | 0.582 | 1.198 | 1.000 | 25 |
| Costa Rica | MAC | MC | 0.147 | -0.264 | 0.512 | 0.712 | 1.000 | 25 |
| Costa Rica | MAC | PB | 0.060 | -0.344 | 0.444 | 0.287 | 1.000 | 25 |
| Costa Rica | MC | PB | -0.108 | -0.482 | 0.300 | -0.519 | 1.000 | 25 |
| Croatia | SES | MI | -0.072 | -0.162 | 0.019 | -1.551 | 0.607 | 466 |
| Croatia | SES | MAC | 0.016 | -0.074 | 0.107 | 0.354 | 1.000 | 467 |
| Croatia | SES | MC | -0.028 | -0.118 | 0.063 | -0.598 | 1.000 | 472 |
| Croatia | SES | PB | -0.089 | -0.178 | 0.001 | -1.944 | 0.368 | 473 |
| Croatia | MI | MAC | 0.191 | 0.101 | 0.277 | 4.154 | 0.000 | 460 |
| Croatia | MI | MC | 0.033 | -0.058 | 0.124 | 0.720 | 1.000 | 465 |
| Croatia | MI | PB | 0.148 | 0.058 | 0.236 | 3.224 | 0.012 | 466 |
| Croatia | MAC | MC | 0.064 | -0.027 | 0.154 | 1.389 | 0.662 | 466 |
| Croatia | MAC | PB | 0.093 | 0.002 | 0.182 | 2.011 | 0.360 | 467 |
| Croatia | MC | PB | 0.085 | -0.006 | 0.174 | 1.844 | 0.395 | 472 |
| Cuba | SES | MI | 0.085 | -0.232 | 0.387 | 0.529 | 1.000 | 40 |
| Cuba | SES | MAC | -0.200 | -0.482 | 0.119 | -1.260 | 1.000 | 40 |
| Cuba | SES | MC | 0.149 | -0.170 | 0.440 | 0.929 | 1.000 | 40 |
| Cuba | SES | PB | 0.010 | -0.303 | 0.320 | 0.059 | 1.000 | 40 |
| Cuba | MI | MAC | 0.203 | -0.116 | 0.484 | 1.280 | 1.000 | 40 |
| Cuba | MI | MC | 0.148 | -0.171 | 0.439 | 0.923 | 1.000 | 40 |
| Cuba | MI | PB | 0.040 | -0.275 | 0.347 | 0.246 | 1.000 | 40 |
| Cuba | MAC | MC | 0.058 | -0.258 | 0.363 | 0.361 | 1.000 | 40 |
| Cuba | MAC | PB | 0.052 | -0.264 | 0.357 | 0.319 | 1.000 | 40 |
| Cuba | MC | PB | 0.377 | 0.074 | 0.616 | 2.510 | 0.165 | 40 |
| Denmark | SES | MI | -0.049 | -0.132 | 0.034 | -1.154 | 0.996 | 553 |
| Denmark | SES | MAC | -0.045 | -0.128 | 0.039 | -1.049 | 0.996 | 553 |
| Denmark | SES | MC | 0.060 | -0.023 | 0.143 | 1.421 | 0.780 | 553 |
| Denmark | SES | PB | -0.037 | -0.120 | 0.046 | -0.877 | 0.996 | 553 |
| Denmark | MI | MAC | 0.407 | 0.335 | 0.474 | 10.457 | 0.000 | 553 |
| Denmark | MI | MC | 0.134 | 0.052 | 0.215 | 3.182 | 0.012 | 553 |
| Denmark | MI | PB | 0.100 | 0.017 | 0.182 | 2.359 | 0.112 | 553 |
| Denmark | MAC | MC | 0.116 | 0.033 | 0.197 | 2.741 | 0.044 | 553 |
| Denmark | MAC | PB | 0.021 | -0.063 | 0.104 | 0.492 | 0.996 | 553 |
| Denmark | MC | PB | 0.184 | 0.102 | 0.263 | 4.385 | 0.000 | 553 |
| Dominican Rep. | SES | MI | -0.296 | -0.577 | 0.047 | -1.754 | 0.890 | 34 |
| Dominican Rep. | SES | MAC | 0.202 | -0.146 | 0.506 | 1.168 | 1.000 | 34 |
| Dominican Rep. | SES | MC | -0.044 | -0.377 | 0.298 | -0.252 | 1.000 | 34 |
| Dominican Rep. | SES | PB | -0.071 | -0.400 | 0.274 | -0.403 | 1.000 | 34 |
| Dominican Rep. | MI | MAC | 0.168 | -0.180 | 0.479 | 0.967 | 1.000 | 34 |
| Dominican Rep. | MI | MC | 0.071 | -0.274 | 0.400 | 0.403 | 1.000 | 34 |
| Dominican Rep. | MI | PB | 0.267 | -0.078 | 0.555 | 1.568 | 1.000 | 34 |
| Dominican Rep. | MAC | MC | 0.121 | -0.226 | 0.441 | 0.692 | 1.000 | 34 |
| Dominican Rep. | MAC | PB | -0.044 | -0.376 | 0.299 | -0.248 | 1.000 | 34 |
| Dominican Rep. | MC | PB | 0.184 | -0.164 | 0.492 | 1.059 | 1.000 | 34 |
| Ecuador | SES | MI | 0.031 | -0.134 | 0.195 | 0.369 | 1.000 | 142 |
| Ecuador | SES | MAC | -0.018 | -0.182 | 0.148 | -0.207 | 1.000 | 142 |
| Ecuador | SES | MC | 0.045 | -0.121 | 0.208 | 0.529 | 1.000 | 142 |
| Ecuador | SES | PB | -0.149 | -0.306 | 0.017 | -1.778 | 0.543 | 142 |
| Ecuador | MI | MAC | 0.277 | 0.118 | 0.422 | 3.409 | 0.009 | 142 |
| Ecuador | MI | MC | 0.031 | -0.135 | 0.194 | 0.362 | 1.000 | 142 |
| Ecuador | MI | PB | -0.202 | -0.355 | -0.039 | -2.442 | 0.134 | 142 |
| Ecuador | MAC | MC | -0.028 | -0.192 | 0.138 | -0.328 | 1.000 | 142 |
| Ecuador | MAC | PB | -0.204 | -0.357 | -0.041 | -2.465 | 0.134 | 142 |
| Ecuador | MC | PB | -0.067 | -0.229 | 0.099 | -0.791 | 1.000 | 142 |
| El Salvador | SES | MI | -0.455 | -0.708 | -0.098 | -2.604 | 0.150 | 28 |
| El Salvador | SES | MAC | 0.020 | -0.355 | 0.390 | 0.104 | 1.000 | 28 |
| El Salvador | SES | MC | -0.093 | -0.451 | 0.290 | -0.477 | 1.000 | 28 |
| El Salvador | SES | PB | -0.089 | -0.447 | 0.294 | -0.456 | 1.000 | 28 |
| El Salvador | MI | MAC | -0.053 | -0.418 | 0.326 | -0.272 | 1.000 | 28 |
| El Salvador | MI | MC | -0.053 | -0.418 | 0.326 | -0.273 | 1.000 | 28 |
| El Salvador | MI | PB | -0.004 | -0.377 | 0.369 | -0.023 | 1.000 | 28 |
| El Salvador | MAC | MC | 0.447 | 0.088 | 0.703 | 2.545 | 0.155 | 28 |
| El Salvador | MAC | PB | -0.235 | -0.559 | 0.152 | -1.232 | 1.000 | 28 |
| El Salvador | MC | PB | 0.156 | -0.230 | 0.500 | 0.806 | 1.000 | 28 |
| Finland | SES | MI | -0.119 | -0.192 | -0.044 | -3.116 | 0.011 | 679 |
| Finland | SES | MAC | 0.012 | -0.063 | 0.087 | 0.311 | 0.756 | 679 |
| Finland | SES | MC | -0.053 | -0.128 | 0.022 | -1.382 | 0.502 | 679 |
| Finland | SES | PB | -0.198 | -0.269 | -0.124 | -5.244 | 0.000 | 679 |
| Finland | MI | MAC | 0.209 | 0.136 | 0.280 | 5.565 | 0.000 | 679 |
| Finland | MI | MC | 0.236 | 0.164 | 0.306 | 6.330 | 0.000 | 679 |
| Finland | MI | PB | 0.202 | 0.129 | 0.273 | 5.373 | 0.000 | 679 |
| Finland | MAC | MC | 0.052 | -0.023 | 0.127 | 1.367 | 0.502 | 679 |
| Finland | MAC | PB | 0.113 | 0.038 | 0.187 | 2.961 | 0.016 | 679 |
| Finland | MC | PB | 0.108 | 0.033 | 0.182 | 2.824 | 0.020 | 679 |
| France | SES | MI | -0.242 | -0.297 | -0.185 | -8.267 | 0.000 | 1102 |
| France | SES | MAC | -0.094 | -0.153 | -0.036 | -3.152 | 0.008 | 1106 |
| France | SES | MC | 0.018 | -0.040 | 0.077 | 0.614 | 0.539 | 1118 |
| France | SES | PB | -0.138 | -0.195 | -0.080 | -4.662 | 0.000 | 1119 |
| France | MI | MAC | 0.387 | 0.336 | 0.437 | 13.892 | 0.000 | 1095 |
| France | MI | MC | 0.037 | -0.022 | 0.096 | 1.222 | 0.444 | 1102 |
| France | MI | PB | 0.084 | 0.025 | 0.142 | 2.782 | 0.016 | 1102 |
| France | MAC | MC | 0.115 | 0.056 | 0.173 | 3.842 | 0.001 | 1105 |
| France | MAC | PB | 0.094 | 0.036 | 0.152 | 3.148 | 0.008 | 1106 |
| France | MC | PB | 0.123 | 0.065 | 0.181 | 4.153 | 0.000 | 1118 |
| Germany | SES | MI | -0.155 | -0.204 | -0.105 | -6.019 | 0.000 | 1481 |
| Germany | SES | MAC | -0.039 | -0.089 | 0.011 | -1.520 | 0.257 | 1512 |
| Germany | SES | MC | -0.021 | -0.071 | 0.028 | -0.841 | 0.400 | 1570 |
| Germany | SES | PB | -0.117 | -0.165 | -0.068 | -4.650 | 0.000 | 1571 |
| Germany | MI | MAC | 0.225 | 0.175 | 0.274 | 8.741 | 0.000 | 1432 |
| Germany | MI | MC | 0.066 | 0.015 | 0.117 | 2.542 | 0.033 | 1480 |
| Germany | MI | PB | 0.145 | 0.095 | 0.195 | 5.648 | 0.000 | 1481 |
| Germany | MAC | MC | 0.082 | 0.032 | 0.132 | 3.203 | 0.006 | 1511 |
| Germany | MAC | PB | 0.144 | 0.094 | 0.193 | 5.649 | 0.000 | 1512 |
| Germany | MC | PB | 0.160 | 0.112 | 0.208 | 6.429 | 0.000 | 1570 |
| Ghana | SES | MI | -0.030 | -0.176 | 0.118 | -0.399 | 1.000 | 178 |
| Ghana | SES | MAC | -0.043 | -0.172 | 0.087 | -0.653 | 1.000 | 229 |
| Ghana | SES | MC | -0.096 | -0.237 | 0.048 | -1.314 | 1.000 | 186 |
| Ghana | SES | PB | -0.036 | -0.150 | 0.079 | -0.611 | 1.000 | 294 |
| Ghana | MI | MAC | 0.594 | 0.489 | 0.682 | 9.710 | 0.000 | 175 |
| Ghana | MI | MC | -0.114 | -0.264 | 0.041 | -1.449 | 1.000 | 161 |
| Ghana | MI | PB | -0.003 | -0.150 | 0.144 | -0.045 | 1.000 | 178 |
| Ghana | MAC | MC | -0.073 | -0.216 | 0.073 | -0.981 | 1.000 | 182 |
| Ghana | MAC | PB | -0.071 | -0.199 | 0.058 | -1.082 | 1.000 | 230 |
| Ghana | MC | PB | -0.042 | -0.185 | 0.102 | -0.575 | 1.000 | 186 |
| Greece | SES | MI | -0.084 | -0.161 | -0.007 | -2.133 | 0.166 | 635 |
| Greece | SES | MAC | -0.092 | -0.169 | -0.015 | -2.339 | 0.118 | 637 |
| Greece | SES | MC | 0.014 | -0.063 | 0.092 | 0.362 | 1.000 | 637 |
| Greece | SES | PB | -0.017 | -0.094 | 0.061 | -0.420 | 1.000 | 637 |
| Greece | MI | MAC | 0.244 | 0.170 | 0.316 | 6.339 | 0.000 | 635 |
| Greece | MI | MC | 0.074 | -0.004 | 0.151 | 1.865 | 0.221 | 635 |
| Greece | MI | PB | 0.114 | 0.036 | 0.190 | 2.886 | 0.028 | 635 |
| Greece | MAC | MC | 0.076 | -0.002 | 0.153 | 1.920 | 0.221 | 637 |
| Greece | MAC | PB | 0.119 | 0.042 | 0.195 | 3.016 | 0.021 | 637 |
| Greece | MC | PB | 0.130 | 0.053 | 0.206 | 3.310 | 0.009 | 637 |
| Guatemala | SES | MI | -0.277 | -0.528 | 0.018 | -1.893 | 0.651 | 45 |
| Guatemala | SES | MAC | -0.185 | -0.454 | 0.114 | -1.237 | 1.000 | 45 |
| Guatemala | SES | MC | 0.171 | -0.129 | 0.443 | 1.141 | 1.000 | 45 |
| Guatemala | SES | PB | -0.153 | -0.427 | 0.147 | -1.015 | 1.000 | 45 |
| Guatemala | MI | MAC | 0.239 | -0.059 | 0.498 | 1.614 | 1.000 | 45 |
| Guatemala | MI | MC | -0.079 | -0.364 | 0.220 | -0.517 | 1.000 | 45 |
| Guatemala | MI | PB | -0.067 | -0.353 | 0.231 | -0.438 | 1.000 | 45 |
| Guatemala | MAC | MC | 0.231 | -0.067 | 0.491 | 1.558 | 1.000 | 45 |
| Guatemala | MAC | PB | -0.049 | -0.338 | 0.248 | -0.323 | 1.000 | 45 |
| Guatemala | MC | PB | -0.032 | -0.323 | 0.264 | -0.210 | 1.000 | 45 |
| Honduras | SES | MI | 0.215 | -0.206 | 0.569 | 1.034 | 1.000 | 24 |
| Honduras | SES | MAC | -0.155 | -0.526 | 0.265 | -0.736 | 1.000 | 24 |
| Honduras | SES | MC | 0.240 | -0.181 | 0.587 | 1.161 | 1.000 | 24 |
| Honduras | SES | PB | -0.179 | -0.543 | 0.242 | -0.855 | 1.000 | 24 |
| Honduras | MI | MAC | 0.599 | 0.258 | 0.807 | 3.510 | 0.020 | 24 |
| Honduras | MI | MC | 0.303 | -0.115 | 0.629 | 1.489 | 1.000 | 24 |
| Honduras | MI | PB | -0.039 | -0.436 | 0.370 | -0.183 | 1.000 | 24 |
| Honduras | MAC | MC | 0.357 | -0.054 | 0.665 | 1.792 | 0.782 | 24 |
| Honduras | MAC | PB | 0.248 | -0.173 | 0.592 | 1.200 | 1.000 | 24 |
| Honduras | MC | PB | 0.124 | -0.294 | 0.502 | 0.585 | 1.000 | 24 |
| Hungary | SES | MI | -0.091 | -0.178 | -0.003 | -2.040 | 0.251 | 497 |
| Hungary | SES | MAC | -0.027 | -0.114 | 0.060 | -0.616 | 1.000 | 505 |
| Hungary | SES | MC | 0.069 | -0.019 | 0.155 | 1.541 | 0.496 | 504 |
| Hungary | SES | PB | -0.106 | -0.192 | -0.019 | -2.392 | 0.137 | 505 |
| Hungary | MI | MAC | 0.244 | 0.160 | 0.325 | 5.611 | 0.000 | 498 |
| Hungary | MI | MC | 0.091 | 0.003 | 0.177 | 2.031 | 0.251 | 498 |
| Hungary | MI | PB | 0.098 | 0.011 | 0.185 | 2.204 | 0.196 | 498 |
| Hungary | MAC | MC | -0.014 | -0.102 | 0.073 | -0.323 | 1.000 | 505 |
| Hungary | MAC | PB | 0.016 | -0.072 | 0.103 | 0.349 | 1.000 | 506 |
| Hungary | MC | PB | 0.134 | 0.048 | 0.219 | 3.042 | 0.022 | 505 |
| India | SES | MI | -0.103 | -0.182 | -0.022 | -2.489 | 0.065 | 585 |
| India | SES | MAC | -0.256 | -0.330 | -0.180 | -6.475 | 0.000 | 599 |
| India | SES | MC | 0.012 | -0.067 | 0.091 | 0.299 | 1.000 | 617 |
| India | SES | PB | -0.241 | -0.314 | -0.166 | -6.201 | 0.000 | 625 |
| India | MI | MAC | -0.081 | -0.161 | 0.001 | -1.938 | 0.212 | 576 |
| India | MI | MC | 0.034 | -0.047 | 0.115 | 0.829 | 1.000 | 582 |
| India | MI | PB | -0.185 | -0.262 | -0.106 | -4.555 | 0.000 | 588 |
| India | MAC | MC | -0.147 | -0.225 | -0.068 | -3.631 | 0.002 | 595 |
| India | MAC | PB | 0.396 | 0.326 | 0.461 | 10.579 | 0.000 | 604 |
| India | MC | PB | -0.003 | -0.081 | 0.076 | -0.066 | 1.000 | 620 |
| Iraq | SES | MI | 0.038 | -0.048 | 0.124 | 0.873 | 1.000 | 518 |
| Iraq | SES | MAC | -0.043 | -0.129 | 0.044 | -0.961 | 1.000 | 511 |
| Iraq | SES | MC | -0.010 | -0.095 | 0.075 | -0.238 | 1.000 | 531 |
| Iraq | SES | PB | -0.048 | -0.132 | 0.037 | -1.115 | 1.000 | 540 |
| Iraq | MI | MAC | 0.297 | 0.214 | 0.375 | 6.924 | 0.000 | 499 |
| Iraq | MI | MC | 0.021 | -0.066 | 0.107 | 0.466 | 1.000 | 514 |
| Iraq | MI | PB | 0.095 | 0.009 | 0.180 | 2.180 | 0.238 | 519 |
| Iraq | MAC | MC | 0.022 | -0.065 | 0.109 | 0.502 | 1.000 | 506 |
| Iraq | MAC | PB | 0.137 | 0.051 | 0.221 | 3.131 | 0.017 | 513 |
| Iraq | MC | PB | 0.015 | -0.070 | 0.100 | 0.355 | 1.000 | 533 |
| Ireland | SES | MI | 0.013 | -0.061 | 0.087 | 0.346 | 1.000 | 706 |
| Ireland | SES | MAC | 0.028 | -0.046 | 0.102 | 0.751 | 1.000 | 708 |
| Ireland | SES | MC | -0.014 | -0.087 | 0.059 | -0.379 | 1.000 | 719 |
| Ireland | SES | PB | -0.009 | -0.082 | 0.064 | -0.254 | 1.000 | 721 |
| Ireland | MI | MAC | 0.154 | 0.081 | 0.226 | 4.116 | 0.000 | 698 |
| Ireland | MI | MC | 0.106 | 0.033 | 0.179 | 2.838 | 0.042 | 705 |
| Ireland | MI | PB | 0.083 | 0.010 | 0.156 | 2.220 | 0.214 | 707 |
| Ireland | MAC | MC | -0.009 | -0.083 | 0.065 | -0.245 | 1.000 | 707 |
| Ireland | MAC | PB | 0.019 | -0.055 | 0.092 | 0.494 | 1.000 | 709 |
| Ireland | MC | PB | 0.068 | -0.005 | 0.140 | 1.821 | 0.483 | 720 |
| Israel | SES | MI | -0.101 | -0.156 | -0.045 | -3.549 | 0.002 | 1231 |
| Israel | SES | MAC | -0.013 | -0.069 | 0.042 | -0.472 | 0.637 | 1228 |
| Israel | SES | MC | 0.102 | 0.047 | 0.157 | 3.613 | 0.002 | 1239 |
| Israel | SES | PB | -0.050 | -0.106 | 0.005 | -1.771 | 0.154 | 1241 |
| Israel | MI | MAC | 0.235 | 0.182 | 0.288 | 8.447 | 0.000 | 1219 |
| Israel | MI | MC | 0.138 | 0.083 | 0.193 | 4.888 | 0.000 | 1229 |
| Israel | MI | PB | 0.081 | 0.025 | 0.136 | 2.838 | 0.014 | 1231 |
| Israel | MAC | MC | 0.126 | 0.070 | 0.181 | 4.443 | 0.000 | 1226 |
| Israel | MAC | PB | 0.088 | 0.032 | 0.143 | 3.102 | 0.008 | 1228 |
| Israel | MC | PB | 0.149 | 0.094 | 0.203 | 5.293 | 0.000 | 1239 |
| Italy | SES | MI | -0.175 | -0.228 | -0.121 | -6.311 | 0.000 | 1264 |
| Italy | SES | MAC | -0.166 | -0.219 | -0.112 | -6.001 | 0.000 | 1273 |
| Italy | SES | MC | -0.010 | -0.065 | 0.045 | -0.366 | 1.000 | 1283 |
| Italy | SES | PB | -0.131 | -0.184 | -0.077 | -4.728 | 0.000 | 1283 |
| Italy | MI | MAC | 0.348 | 0.298 | 0.396 | 13.165 | 0.000 | 1260 |
| Italy | MI | MC | 0.004 | -0.051 | 0.059 | 0.145 | 1.000 | 1264 |
| Italy | MI | PB | 0.057 | 0.002 | 0.112 | 2.042 | 0.124 | 1264 |
| Italy | MAC | MC | 0.114 | 0.060 | 0.168 | 4.096 | 0.000 | 1273 |
| Italy | MAC | PB | 0.104 | 0.049 | 0.158 | 3.724 | 0.001 | 1273 |
| Italy | MC | PB | 0.141 | 0.087 | 0.194 | 5.092 | 0.000 | 1283 |
| Japan | SES | MI | -0.284 | -0.336 | -0.230 | -9.998 | 0.000 | 1144 |
| Japan | SES | MAC | -0.251 | -0.304 | -0.196 | -8.769 | 0.000 | 1147 |
| Japan | SES | MC | -0.028 | -0.085 | 0.030 | -0.948 | 0.343 | 1158 |
| Japan | SES | PB | -0.149 | -0.205 | -0.092 | -5.123 | 0.000 | 1159 |
| Japan | MI | MAC | 0.461 | 0.414 | 0.506 | 17.524 | 0.000 | 1140 |
| Japan | MI | MC | 0.120 | 0.062 | 0.176 | 4.068 | 0.000 | 1144 |
| Japan | MI | PB | 0.142 | 0.085 | 0.199 | 4.864 | 0.000 | 1145 |
| Japan | MAC | MC | 0.098 | 0.040 | 0.155 | 3.323 | 0.002 | 1148 |
| Japan | MAC | PB | 0.122 | 0.064 | 0.178 | 4.150 | 0.000 | 1149 |
| Japan | MC | PB | 0.173 | 0.116 | 0.228 | 5.972 | 0.000 | 1160 |
| Latvia | SES | MI | 0.116 | 0.052 | 0.178 | 3.556 | 0.004 | 935 |
| Latvia | SES | MAC | 0.004 | -0.060 | 0.068 | 0.129 | 1.000 | 935 |
| Latvia | SES | MC | 0.020 | -0.044 | 0.084 | 0.603 | 1.000 | 935 |
| Latvia | SES | PB | 0.096 | 0.032 | 0.159 | 2.947 | 0.026 | 935 |
| Latvia | MI | MAC | 0.185 | 0.122 | 0.246 | 5.744 | 0.000 | 935 |
| Latvia | MI | MC | 0.063 | -0.001 | 0.127 | 1.931 | 0.215 | 935 |
| Latvia | MI | PB | 0.073 | 0.009 | 0.137 | 2.238 | 0.127 | 935 |
| Latvia | MAC | MC | 0.048 | -0.017 | 0.111 | 1.457 | 0.436 | 935 |
| Latvia | MAC | PB | 0.085 | 0.022 | 0.149 | 2.621 | 0.062 | 935 |
| Latvia | MC | PB | 0.077 | 0.013 | 0.141 | 2.368 | 0.109 | 935 |
| Mexico | SES | MI | -0.082 | -0.137 | -0.026 | -2.855 | 0.035 | 1217 |
| Mexico | SES | MAC | -0.049 | -0.105 | 0.007 | -1.710 | 0.437 | 1226 |
| Mexico | SES | MC | -0.019 | -0.075 | 0.037 | -0.670 | 1.000 | 1230 |
| Mexico | SES | PB | -0.059 | -0.114 | -0.003 | -2.068 | 0.272 | 1236 |
| Mexico | MI | MAC | 0.163 | 0.108 | 0.218 | 5.760 | 0.000 | 1210 |
| Mexico | MI | MC | 0.044 | -0.012 | 0.100 | 1.537 | 0.499 | 1211 |
| Mexico | MI | PB | 0.044 | -0.013 | 0.100 | 1.521 | 0.499 | 1217 |
| Mexico | MAC | MC | 0.053 | -0.003 | 0.109 | 1.868 | 0.372 | 1221 |
| Mexico | MAC | PB | -0.017 | -0.073 | 0.039 | -0.582 | 1.000 | 1226 |
| Mexico | MC | PB | 0.112 | 0.056 | 0.167 | 3.939 | 0.001 | 1230 |
| Morocco | SES | MI | -0.038 | -0.118 | 0.043 | -0.927 | 1.000 | 592 |
| Morocco | SES | MAC | -0.032 | -0.113 | 0.049 | -0.782 | 1.000 | 589 |
| Morocco | SES | MC | 0.027 | -0.052 | 0.105 | 0.670 | 1.000 | 621 |
| Morocco | SES | PB | -0.143 | -0.218 | -0.067 | -3.668 | 0.003 | 644 |
| Morocco | MI | MAC | 0.147 | 0.065 | 0.227 | 3.506 | 0.004 | 562 |
| Morocco | MI | MC | 0.103 | 0.022 | 0.183 | 2.492 | 0.091 | 581 |
| Morocco | MI | PB | 0.075 | -0.005 | 0.155 | 1.834 | 0.403 | 592 |
| Morocco | MAC | MC | 0.055 | -0.027 | 0.136 | 1.321 | 0.748 | 577 |
| Morocco | MAC | PB | 0.062 | -0.019 | 0.142 | 1.506 | 0.663 | 589 |
| Morocco | MC | PB | 0.120 | 0.042 | 0.197 | 3.005 | 0.022 | 621 |
| Nepal | SES | MI | -0.150 | -0.254 | -0.043 | -2.746 | 0.045 | 329 |
| Nepal | SES | MAC | -0.166 | -0.270 | -0.059 | -3.042 | 0.023 | 328 |
| Nepal | SES | MC | 0.001 | -0.106 | 0.108 | 0.013 | 1.000 | 337 |
| Nepal | SES | PB | 0.073 | -0.033 | 0.178 | 1.351 | 0.533 | 342 |
| Nepal | MI | MAC | 0.260 | 0.155 | 0.359 | 4.811 | 0.000 | 321 |
| Nepal | MI | MC | 0.030 | -0.078 | 0.138 | 0.548 | 1.000 | 327 |
| Nepal | MI | PB | 0.087 | -0.021 | 0.193 | 1.590 | 0.451 | 331 |
| Nepal | MAC | MC | 0.105 | -0.003 | 0.211 | 1.915 | 0.338 | 328 |
| Nepal | MAC | PB | 0.099 | -0.008 | 0.205 | 1.813 | 0.354 | 332 |
| Nepal | MC | PB | 0.151 | 0.046 | 0.253 | 2.815 | 0.041 | 341 |
| Netherlands | SES | MI | -0.036 | -0.091 | 0.019 | -1.283 | 0.399 | 1262 |
| Netherlands | SES | MAC | -0.003 | -0.058 | 0.052 | -0.109 | 0.913 | 1271 |
| Netherlands | SES | MC | 0.087 | 0.033 | 0.142 | 3.135 | 0.007 | 1279 |
| Netherlands | SES | PB | -0.125 | -0.179 | -0.072 | -4.549 | 0.000 | 1295 |
| Netherlands | MI | MAC | 0.219 | 0.165 | 0.271 | 7.902 | 0.000 | 1246 |
| Netherlands | MI | MC | 0.124 | 0.069 | 0.178 | 4.424 | 0.000 | 1251 |
| Netherlands | MI | PB | 0.179 | 0.125 | 0.232 | 6.456 | 0.000 | 1264 |
| Netherlands | MAC | MC | 0.080 | 0.025 | 0.134 | 2.834 | 0.014 | 1260 |
| Netherlands | MAC | PB | 0.104 | 0.049 | 0.158 | 3.733 | 0.001 | 1273 |
| Netherlands | MC | PB | 0.136 | 0.082 | 0.190 | 4.921 | 0.000 | 1281 |
| New Zealand | SES | MI | -0.219 | -0.301 | -0.134 | -5.013 | 0.000 | 502 |
| New Zealand | SES | MAC | -0.092 | -0.178 | -0.005 | -2.074 | 0.270 | 502 |
| New Zealand | SES | MC | 0.031 | -0.056 | 0.118 | 0.691 | 0.980 | 507 |
| New Zealand | SES | PB | -0.047 | -0.133 | 0.041 | -1.048 | 0.974 | 508 |
| New Zealand | MI | MAC | 0.307 | 0.225 | 0.384 | 7.185 | 0.000 | 499 |
| New Zealand | MI | MC | 0.031 | -0.057 | 0.118 | 0.687 | 0.980 | 502 |
| New Zealand | MI | PB | 0.146 | 0.059 | 0.230 | 3.292 | 0.009 | 503 |
| New Zealand | MAC | MC | 0.070 | -0.017 | 0.157 | 1.577 | 0.693 | 502 |
| New Zealand | MAC | PB | 0.052 | -0.035 | 0.139 | 1.168 | 0.974 | 503 |
| New Zealand | MC | PB | 0.065 | -0.022 | 0.151 | 1.463 | 0.721 | 508 |
| Nicaragua | SES | MI | -0.424 | -0.760 | 0.091 | -1.751 | 0.713 | 16 |
| Nicaragua | SES | MAC | -0.473 | -0.785 | 0.030 | -2.008 | 0.579 | 16 |
| Nicaragua | SES | MC | 0.046 | -0.460 | 0.529 | 0.171 | 1.000 | 16 |
| Nicaragua | SES | PB | -0.443 | -0.770 | 0.067 | -1.851 | 0.683 | 16 |
| Nicaragua | MI | MAC | 0.135 | -0.387 | 0.591 | 0.509 | 1.000 | 16 |
| Nicaragua | MI | MC | 0.067 | -0.443 | 0.545 | 0.252 | 1.000 | 16 |
| Nicaragua | MI | PB | 0.191 | -0.336 | 0.628 | 0.730 | 1.000 | 16 |
| Nicaragua | MAC | MC | 0.117 | -0.402 | 0.579 | 0.442 | 1.000 | 16 |
| Nicaragua | MAC | PB | 0.652 | 0.231 | 0.867 | 3.219 | 0.062 | 16 |
| Nicaragua | MC | PB | -0.154 | -0.604 | 0.370 | -0.585 | 1.000 | 16 |
| Nigeria | SES | MI | -0.135 | -0.219 | -0.049 | -3.093 | 0.019 | 515 |
| Nigeria | SES | MAC | -0.108 | -0.193 | -0.023 | -2.484 | 0.106 | 521 |
| Nigeria | SES | MC | 0.063 | -0.023 | 0.147 | 1.437 | 0.907 | 526 |
| Nigeria | SES | PB | -0.060 | -0.145 | 0.025 | -1.380 | 0.907 | 526 |
| Nigeria | MI | MAC | 0.243 | 0.161 | 0.321 | 5.743 | 0.000 | 529 |
| Nigeria | MI | MC | 0.001 | -0.084 | 0.086 | 0.020 | 1.000 | 535 |
| Nigeria | MI | PB | 0.098 | 0.014 | 0.181 | 2.286 | 0.158 | 538 |
| Nigeria | MAC | MC | 0.043 | -0.041 | 0.127 | 1.001 | 1.000 | 540 |
| Nigeria | MAC | PB | 0.042 | -0.043 | 0.125 | 0.969 | 1.000 | 543 |
| Nigeria | MC | PB | 0.016 | -0.067 | 0.099 | 0.375 | 1.000 | 554 |
| N. Macedonia | SES | MI | -0.118 | -0.192 | -0.042 | -3.056 | 0.019 | 666 |
| N. Macedonia | SES | MAC | -0.116 | -0.190 | -0.040 | -3.009 | 0.019 | 667 |
| N. Macedonia | SES | MC | -0.028 | -0.103 | 0.046 | -0.742 | 1.000 | 692 |
| N. Macedonia | SES | PB | 0.020 | -0.054 | 0.095 | 0.538 | 1.000 | 694 |
| N. Macedonia | MI | MAC | 0.194 | 0.119 | 0.268 | 5.015 | 0.000 | 643 |
| N. Macedonia | MI | MC | 0.127 | 0.052 | 0.201 | 3.308 | 0.009 | 667 |
| N. Macedonia | MI | PB | 0.063 | -0.013 | 0.138 | 1.624 | 0.419 | 667 |
| N. Macedonia | MAC | MC | 0.087 | 0.011 | 0.162 | 2.248 | 0.125 | 666 |
| N. Macedonia | MAC | PB | 0.030 | -0.045 | 0.106 | 0.787 | 1.000 | 668 |
| N. Macedonia | MC | PB | 0.096 | 0.022 | 0.169 | 2.542 | 0.067 | 694 |
| Norway | SES | MI | -0.093 | -0.178 | -0.007 | -2.123 | 0.137 | 514 |
| Norway | SES | MAC | 0.031 | -0.056 | 0.118 | 0.707 | 0.960 | 508 |
| Norway | SES | MC | 0.054 | -0.032 | 0.139 | 1.240 | 0.646 | 523 |
| Norway | SES | PB | -0.106 | -0.189 | -0.020 | -2.433 | 0.077 | 526 |
| Norway | MI | MAC | 0.204 | 0.118 | 0.286 | 4.650 | 0.000 | 501 |
| Norway | MI | MC | 0.228 | 0.145 | 0.309 | 5.298 | 0.000 | 512 |
| Norway | MI | PB | 0.134 | 0.048 | 0.218 | 3.051 | 0.015 | 514 |
| Norway | MAC | MC | 0.163 | 0.077 | 0.247 | 3.712 | 0.002 | 507 |
| Norway | MAC | PB | 0.006 | -0.081 | 0.093 | 0.131 | 0.960 | 508 |
| Norway | MC | PB | 0.134 | 0.048 | 0.217 | 3.079 | 0.015 | 523 |
| Pakistan | SES | MI | -0.056 | -0.147 | 0.035 | -1.207 | 1.000 | 459 |
| Pakistan | SES | MAC | 0.003 | -0.089 | 0.094 | 0.056 | 1.000 | 456 |
| Pakistan | SES | MC | -0.027 | -0.118 | 0.063 | -0.592 | 1.000 | 466 |
| Pakistan | SES | PB | -0.003 | -0.093 | 0.087 | -0.065 | 1.000 | 470 |
| Pakistan | MI | MAC | 0.248 | 0.160 | 0.333 | 5.429 | 0.000 | 451 |
| Pakistan | MI | MC | -0.014 | -0.105 | 0.078 | -0.288 | 1.000 | 457 |
| Pakistan | MI | PB | -0.021 | -0.112 | 0.071 | -0.448 | 1.000 | 462 |
| Pakistan | MAC | MC | -0.021 | -0.112 | 0.071 | -0.438 | 1.000 | 456 |
| Pakistan | MAC | PB | 0.009 | -0.082 | 0.101 | 0.202 | 1.000 | 460 |
| Pakistan | MC | PB | 0.129 | 0.039 | 0.217 | 2.809 | 0.047 | 469 |
| Panama | SES | MI | -0.112 | -0.562 | 0.390 | -0.435 | 1.000 | 17 |
| Panama | SES | MAC | -0.104 | -0.557 | 0.397 | -0.404 | 1.000 | 17 |
| Panama | SES | MC | -0.367 | -0.720 | 0.138 | -1.526 | 1.000 | 17 |
| Panama | SES | PB | -0.282 | -0.672 | 0.230 | -1.138 | 1.000 | 17 |
| Panama | MI | MAC | 0.461 | -0.025 | 0.771 | 2.014 | 0.623 | 17 |
| Panama | MI | MC | -0.229 | -0.639 | 0.283 | -0.911 | 1.000 | 17 |
| Panama | MI | PB | -0.368 | -0.721 | 0.137 | -1.532 | 1.000 | 17 |
| Panama | MAC | MC | 0.214 | -0.297 | 0.630 | 0.848 | 1.000 | 17 |
| Panama | MAC | PB | -0.314 | -0.691 | 0.196 | -1.282 | 1.000 | 17 |
| Panama | MC | PB | 0.248 | -0.265 | 0.651 | 0.990 | 1.000 | 17 |
| Paraguay | SES | MI | 0.182 | -0.221 | 0.532 | 0.905 | 1.000 | 26 |
| Paraguay | SES | MAC | -0.270 | -0.595 | 0.131 | -1.376 | 1.000 | 26 |
| Paraguay | SES | MC | -0.020 | -0.405 | 0.370 | -0.100 | 1.000 | 26 |
| Paraguay | SES | PB | -0.404 | -0.684 | -0.020 | -2.164 | 0.406 | 26 |
| Paraguay | MI | MAC | 0.101 | -0.298 | 0.470 | 0.498 | 1.000 | 26 |
| Paraguay | MI | MC | 0.295 | -0.105 | 0.612 | 1.510 | 1.000 | 26 |
| Paraguay | MI | PB | -0.276 | -0.599 | 0.125 | -1.406 | 1.000 | 26 |
| Paraguay | MAC | MC | 0.130 | -0.271 | 0.492 | 0.642 | 1.000 | 26 |
| Paraguay | MAC | PB | -0.331 | -0.636 | 0.065 | -1.716 | 0.892 | 26 |
| Paraguay | MC | PB | 0.095 | -0.304 | 0.465 | 0.467 | 1.000 | 26 |
| Peru | SES | MI | 0.132 | -0.080 | 0.332 | 1.233 | 1.000 | 88 |
| Peru | SES | MAC | -0.098 | -0.302 | 0.113 | -0.917 | 1.000 | 88 |
| Peru | SES | MC | 0.037 | -0.174 | 0.244 | 0.343 | 1.000 | 88 |
| Peru | SES | PB | -0.006 | -0.215 | 0.204 | -0.057 | 1.000 | 88 |
| Peru | MI | MAC | -0.141 | -0.341 | 0.070 | -1.325 | 1.000 | 88 |
| Peru | MI | MC | 0.107 | -0.104 | 0.310 | 1.001 | 1.000 | 88 |
| Peru | MI | PB | 0.017 | -0.193 | 0.226 | 0.158 | 1.000 | 88 |
| Peru | MAC | MC | 0.143 | -0.068 | 0.343 | 1.344 | 1.000 | 88 |
| Peru | MAC | PB | 0.220 | 0.011 | 0.411 | 2.092 | 0.394 | 88 |
| Peru | MC | PB | 0.200 | -0.010 | 0.393 | 1.895 | 0.554 | 88 |
| Philippines | SES | MI | -0.269 | -0.349 | -0.185 | -6.211 | 0.000 | 497 |
| Philippines | SES | MAC | -0.218 | -0.300 | -0.133 | -4.980 | 0.000 | 498 |
| Philippines | SES | MC | 0.087 | 0.000 | 0.173 | 1.959 | 0.304 | 506 |
| Philippines | SES | PB | -0.044 | -0.131 | 0.043 | -0.998 | 0.957 | 507 |
| Philippines | MI | MAC | 0.401 | 0.324 | 0.472 | 9.725 | 0.000 | 496 |
| Philippines | MI | MC | -0.125 | -0.210 | -0.038 | -2.807 | 0.036 | 499 |
| Philippines | MI | PB | 0.007 | -0.081 | 0.095 | 0.158 | 1.000 | 500 |
| Philippines | MAC | MC | 0.061 | -0.027 | 0.148 | 1.362 | 0.696 | 501 |
| Philippines | MAC | PB | 0.012 | -0.076 | 0.099 | 0.270 | 1.000 | 502 |
| Philippines | MC | PB | 0.069 | -0.018 | 0.155 | 1.566 | 0.589 | 510 |
| Poland | SES | MI | -0.155 | -0.200 | -0.110 | -6.672 | 0.000 | 1800 |
| Poland | SES | MAC | -0.064 | -0.110 | -0.018 | -2.737 | 0.031 | 1800 |
| Poland | SES | MC | -0.022 | -0.068 | 0.024 | -0.944 | 0.345 | 1800 |
| Poland | SES | PB | -0.054 | -0.100 | -0.008 | -2.313 | 0.063 | 1800 |
| Poland | MI | MAC | 0.287 | 0.244 | 0.329 | 12.691 | 0.000 | 1800 |
| Poland | MI | MC | 0.033 | -0.013 | 0.079 | 1.392 | 0.328 | 1800 |
| Poland | MI | PB | 0.160 | 0.115 | 0.205 | 6.887 | 0.000 | 1800 |
| Poland | MAC | MC | 0.131 | 0.085 | 0.176 | 5.584 | 0.000 | 1800 |
| Poland | MAC | PB | 0.058 | 0.011 | 0.103 | 2.445 | 0.058 | 1800 |
| Poland | MC | PB | 0.111 | 0.065 | 0.156 | 4.724 | 0.000 | 1800 |
| Romania | SES | MI | -0.086 | -0.173 | 0.002 | -1.913 | 0.451 | 491 |
| Romania | SES | MAC | 0.025 | -0.064 | 0.112 | 0.548 | 1.000 | 496 |
| Romania | SES | MC | 0.009 | -0.079 | 0.096 | 0.197 | 1.000 | 503 |
| Romania | SES | PB | 0.011 | -0.076 | 0.098 | 0.247 | 1.000 | 503 |
| Romania | MI | MAC | 0.457 | 0.383 | 0.524 | 11.299 | 0.000 | 486 |
| Romania | MI | MC | -0.068 | -0.156 | 0.021 | -1.510 | 0.922 | 491 |
| Romania | MI | PB | 0.104 | 0.016 | 0.191 | 2.321 | 0.186 | 491 |
| Romania | MAC | MC | -0.065 | -0.152 | 0.024 | -1.438 | 0.922 | 496 |
| Romania | MAC | PB | 0.045 | -0.043 | 0.132 | 0.998 | 1.000 | 496 |
| Romania | MC | PB | 0.049 | -0.039 | 0.136 | 1.094 | 1.000 | 503 |
| Russia | SES | MI | 0.123 | 0.040 | 0.204 | 2.911 | 0.030 | 556 |
| Russia | SES | MAC | -0.007 | -0.090 | 0.076 | -0.159 | 0.879 | 556 |
| Russia | SES | MC | 0.058 | -0.026 | 0.140 | 1.357 | 0.662 | 556 |
| Russia | SES | PB | 0.101 | 0.018 | 0.183 | 2.387 | 0.104 | 556 |
| Russia | MI | MAC | 0.295 | 0.217 | 0.369 | 7.258 | 0.000 | 556 |
| Russia | MI | MC | 0.112 | 0.029 | 0.194 | 2.660 | 0.056 | 556 |
| Russia | MI | PB | 0.098 | 0.015 | 0.179 | 2.308 | 0.107 | 556 |
| Russia | MAC | MC | 0.059 | -0.024 | 0.141 | 1.389 | 0.662 | 556 |
| Russia | MAC | PB | 0.033 | -0.050 | 0.116 | 0.773 | 0.879 | 556 |
| Russia | MC | PB | 0.195 | 0.113 | 0.274 | 4.675 | 0.000 | 556 |
| Senegal | SES | MI | 0.048 | -0.069 | 0.164 | 0.806 | 1.000 | 281 |
| Senegal | SES | MAC | -0.015 | -0.129 | 0.100 | -0.248 | 1.000 | 293 |
| Senegal | SES | MC | -0.081 | -0.190 | 0.030 | -1.437 | 1.000 | 314 |
| Senegal | SES | PB | 0.013 | -0.093 | 0.119 | 0.240 | 1.000 | 342 |
| Senegal | MI | MAC | 0.134 | 0.013 | 0.250 | 2.185 | 0.268 | 265 |
| Senegal | MI | MC | 0.000 | -0.119 | 0.119 | 0.000 | 1.000 | 271 |
| Senegal | MI | PB | 0.084 | -0.033 | 0.199 | 1.413 | 1.000 | 281 |
| Senegal | MAC | MC | 0.034 | -0.083 | 0.150 | 0.568 | 1.000 | 281 |
| Senegal | MAC | PB | -0.046 | -0.159 | 0.069 | -0.777 | 1.000 | 293 |
| Senegal | MC | PB | 0.140 | 0.029 | 0.246 | 2.489 | 0.133 | 314 |
| Serbia | SES | MI | -0.088 | -0.163 | -0.013 | -2.287 | 0.203 | 665 |
| Serbia | SES | MAC | -0.081 | -0.156 | -0.005 | -2.091 | 0.235 | 666 |
| Serbia | SES | MC | -0.053 | -0.128 | 0.023 | -1.373 | 0.681 | 677 |
| Serbia | SES | PB | -0.017 | -0.092 | 0.058 | -0.440 | 1.000 | 683 |
| Serbia | MI | MAC | 0.086 | 0.009 | 0.161 | 2.196 | 0.228 | 655 |
| Serbia | MI | MC | 0.063 | -0.014 | 0.138 | 1.612 | 0.537 | 663 |
| Serbia | MI | PB | 0.100 | 0.024 | 0.175 | 2.595 | 0.097 | 667 |
| Serbia | MAC | MC | 0.030 | -0.046 | 0.105 | 0.764 | 1.000 | 665 |
| Serbia | MAC | PB | 0.082 | 0.006 | 0.157 | 2.130 | 0.235 | 668 |
| Serbia | MC | PB | 0.007 | -0.068 | 0.083 | 0.193 | 1.000 | 679 |
| Singapore | SES | MI | -0.265 | -0.344 | -0.183 | -6.217 | 0.000 | 514 |
| Singapore | SES | MAC | -0.114 | -0.198 | -0.027 | -2.587 | 0.080 | 512 |
| Singapore | SES | MC | 0.014 | -0.072 | 0.100 | 0.323 | 1.000 | 516 |
| Singapore | SES | PB | 0.000 | -0.086 | 0.087 | 0.011 | 1.000 | 516 |
| Singapore | MI | MAC | 0.414 | 0.340 | 0.483 | 10.377 | 0.000 | 522 |
| Singapore | MI | MC | 0.068 | -0.018 | 0.153 | 1.561 | 0.833 | 523 |
| Singapore | MI | PB | 0.052 | -0.034 | 0.136 | 1.184 | 1.000 | 527 |
| Singapore | MAC | MC | 0.064 | -0.022 | 0.150 | 1.470 | 0.853 | 520 |
| Singapore | MAC | PB | 0.053 | -0.033 | 0.138 | 1.215 | 1.000 | 525 |
| Singapore | MC | PB | 0.034 | -0.051 | 0.119 | 0.789 | 1.000 | 529 |
| Slovakia | SES | MI | -0.142 | -0.197 | -0.086 | -4.984 | 0.000 | 1210 |
| Slovakia | SES | MAC | -0.049 | -0.105 | 0.007 | -1.711 | 0.262 | 1215 |
| Slovakia | SES | MC | 0.056 | 0.000 | 0.111 | 1.946 | 0.207 | 1221 |
| Slovakia | SES | PB | -0.046 | -0.102 | 0.010 | -1.603 | 0.262 | 1225 |
| Slovakia | MI | MAC | 0.350 | 0.300 | 0.399 | 12.958 | 0.000 | 1202 |
| Slovakia | MI | MC | -0.004 | -0.060 | 0.053 | -0.127 | 0.899 | 1206 |
| Slovakia | MI | PB | 0.095 | 0.039 | 0.151 | 3.328 | 0.007 | 1210 |
| Slovakia | MAC | MC | 0.091 | 0.035 | 0.146 | 3.175 | 0.011 | 1212 |
| Slovakia | MAC | PB | 0.082 | 0.026 | 0.138 | 2.879 | 0.020 | 1215 |
| Slovakia | MC | PB | 0.086 | 0.030 | 0.141 | 3.005 | 0.016 | 1221 |
| South Africa | SES | MI | 0.133 | 0.025 | 0.239 | 2.413 | 0.131 | 323 |
| South Africa | SES | MAC | -0.019 | -0.125 | 0.087 | -0.357 | 1.000 | 341 |
| South Africa | SES | MC | -0.006 | -0.099 | 0.086 | -0.131 | 1.000 | 449 |
| South Africa | SES | PB | -0.181 | -0.269 | -0.090 | -3.897 | 0.001 | 451 |
| South Africa | MI | MAC | 0.165 | 0.048 | 0.276 | 2.786 | 0.051 | 281 |
| South Africa | MI | MC | 0.067 | -0.042 | 0.175 | 1.207 | 1.000 | 323 |
| South Africa | MI | PB | -0.005 | -0.114 | 0.104 | -0.090 | 1.000 | 325 |
| South Africa | MAC | MC | -0.007 | -0.113 | 0.099 | -0.133 | 1.000 | 341 |
| South Africa | MAC | PB | -0.032 | -0.137 | 0.074 | -0.591 | 1.000 | 343 |
| South Africa | MC | PB | 0.104 | 0.012 | 0.195 | 2.223 | 0.187 | 451 |
| South Korea | SES | MI | -0.194 | -0.278 | -0.107 | -4.359 | 0.000 | 488 |
| South Korea | SES | MAC | -0.145 | -0.231 | -0.058 | -3.248 | 0.007 | 492 |
| South Korea | SES | MC | -0.106 | -0.192 | -0.018 | -2.360 | 0.056 | 495 |
| South Korea | SES | PB | -0.132 | -0.217 | -0.044 | -2.952 | 0.017 | 495 |
| South Korea | MI | MAC | 0.577 | 0.514 | 0.633 | 15.549 | 0.000 | 487 |
| South Korea | MI | MC | 0.078 | -0.011 | 0.165 | 1.720 | 0.086 | 488 |
| South Korea | MI | PB | 0.161 | 0.073 | 0.246 | 3.597 | 0.003 | 488 |
| South Korea | MAC | MC | 0.100 | 0.012 | 0.187 | 2.226 | 0.056 | 492 |
| South Korea | MAC | PB | 0.114 | 0.026 | 0.200 | 2.540 | 0.046 | 492 |
| South Korea | MC | PB | 0.156 | 0.069 | 0.241 | 3.512 | 0.003 | 495 |
| Spain | SES | MI | -0.076 | -0.136 | -0.015 | -2.451 | 0.086 | 1047 |
| Spain | SES | MAC | 0.007 | -0.053 | 0.067 | 0.225 | 1.000 | 1058 |
| Spain | SES | MC | 0.030 | -0.030 | 0.089 | 0.976 | 0.988 | 1080 |
| Spain | SES | PB | -0.082 | -0.141 | -0.023 | -2.724 | 0.046 | 1087 |
| Spain | MI | MAC | 0.152 | 0.092 | 0.211 | 4.921 | 0.000 | 1029 |
| Spain | MI | MC | 0.182 | 0.122 | 0.240 | 5.965 | 0.000 | 1044 |
| Spain | MI | PB | 0.069 | 0.008 | 0.129 | 2.238 | 0.127 | 1049 |
| Spain | MAC | MC | -0.003 | -0.063 | 0.058 | -0.081 | 1.000 | 1053 |
| Spain | MAC | PB | 0.064 | 0.004 | 0.124 | 2.100 | 0.144 | 1060 |
| Spain | MC | PB | 0.151 | 0.092 | 0.209 | 5.014 | 0.000 | 1081 |
| Sweden | SES | MI | -0.036 | -0.086 | 0.015 | -1.393 | 0.274 | 1528 |
| Sweden | SES | MAC | -0.038 | -0.088 | 0.012 | -1.488 | 0.274 | 1532 |
| Sweden | SES | MC | 0.079 | 0.029 | 0.128 | 3.105 | 0.012 | 1550 |
| Sweden | SES | PB | -0.075 | -0.124 | -0.025 | -2.957 | 0.016 | 1563 |
| Sweden | MI | MAC | 0.192 | 0.143 | 0.241 | 7.589 | 0.000 | 1502 |
| Sweden | MI | MC | 0.203 | 0.155 | 0.251 | 8.077 | 0.000 | 1515 |
| Sweden | MI | PB | 0.147 | 0.098 | 0.196 | 5.820 | 0.000 | 1528 |
| Sweden | MAC | MC | 0.049 | -0.002 | 0.099 | 1.901 | 0.173 | 1521 |
| Sweden | MAC | PB | 0.065 | 0.015 | 0.114 | 2.531 | 0.046 | 1532 |
| Sweden | MC | PB | 0.101 | 0.052 | 0.150 | 4.000 | 0.000 | 1550 |
| Switzerland | SES | MI | -0.102 | -0.162 | -0.042 | -3.325 | 0.007 | 1052 |
| Switzerland | SES | MAC | -0.003 | -0.064 | 0.057 | -0.112 | 0.911 | 1052 |
| Switzerland | SES | MC | 0.054 | -0.006 | 0.114 | 1.756 | 0.318 | 1052 |
| Switzerland | SES | PB | -0.192 | -0.250 | -0.133 | -6.344 | 0.000 | 1052 |
| Switzerland | MI | MAC | 0.272 | 0.215 | 0.327 | 9.149 | 0.000 | 1052 |
| Switzerland | MI | MC | 0.082 | 0.022 | 0.142 | 2.675 | 0.046 | 1052 |
| Switzerland | MI | PB | 0.060 | -0.001 | 0.120 | 1.940 | 0.263 | 1052 |
| Switzerland | MAC | MC | 0.040 | -0.021 | 0.100 | 1.285 | 0.398 | 1052 |
| Switzerland | MAC | PB | 0.096 | 0.036 | 0.156 | 3.140 | 0.012 | 1052 |
| Switzerland | MC | PB | 0.047 | -0.013 | 0.107 | 1.528 | 0.381 | 1052 |
| Taiwan | SES | MI | -0.200 | -0.265 | -0.134 | -5.893 | 0.000 | 833 |
| Taiwan | SES | MAC | -0.084 | -0.151 | -0.016 | -2.417 | 0.127 | 833 |
| Taiwan | SES | MC | -0.037 | -0.105 | 0.031 | -1.066 | 1.000 | 833 |
| Taiwan | SES | PB | -0.053 | -0.120 | 0.015 | -1.521 | 0.772 | 833 |
| Taiwan | MI | MAC | 0.351 | 0.290 | 0.409 | 10.792 | 0.000 | 833 |
| Taiwan | MI | MC | -0.019 | -0.087 | 0.049 | -0.561 | 1.000 | 833 |
| Taiwan | MI | PB | 0.016 | -0.052 | 0.084 | 0.469 | 1.000 | 833 |
| Taiwan | MAC | MC | 0.030 | -0.038 | 0.098 | 0.867 | 1.000 | 833 |
| Taiwan | MAC | PB | 0.032 | -0.036 | 0.100 | 0.923 | 1.000 | 833 |
| Taiwan | MC | PB | 0.079 | 0.011 | 0.146 | 2.273 | 0.163 | 833 |
| Turkey | SES | MI | -0.277 | -0.325 | -0.228 | -10.799 | 0.000 | 1405 |
| Turkey | SES | MAC | -0.091 | -0.143 | -0.039 | -3.449 | 0.003 | 1416 |
| Turkey | SES | MC | 0.012 | -0.040 | 0.064 | 0.451 | 1.000 | 1422 |
| Turkey | SES | PB | -0.132 | -0.182 | -0.080 | -5.001 | 0.000 | 1422 |
| Turkey | MI | MAC | 0.374 | 0.328 | 0.418 | 15.149 | 0.000 | 1411 |
| Turkey | MI | MC | 0.010 | -0.042 | 0.062 | 0.364 | 1.000 | 1416 |
| Turkey | MI | PB | 0.150 | 0.098 | 0.200 | 5.695 | 0.000 | 1416 |
| Turkey | MAC | MC | 0.026 | -0.026 | 0.077 | 0.968 | 0.999 | 1427 |
| Turkey | MAC | PB | 0.072 | 0.020 | 0.123 | 2.710 | 0.034 | 1427 |
| Turkey | MC | PB | 0.063 | 0.011 | 0.114 | 2.375 | 0.071 | 1433 |
| Ukraine | SES | MI | -0.220 | -0.296 | -0.141 | -5.411 | 0.000 | 577 |
| Ukraine | SES | MAC | -0.039 | -0.121 | 0.042 | -0.944 | 1.000 | 577 |
| Ukraine | SES | MC | -0.025 | -0.107 | 0.056 | -0.606 | 1.000 | 577 |
| Ukraine | SES | PB | -0.078 | -0.159 | 0.004 | -1.875 | 0.368 | 577 |
| Ukraine | MI | MAC | 0.170 | 0.090 | 0.248 | 4.140 | 0.000 | 577 |
| Ukraine | MI | MC | 0.025 | -0.056 | 0.107 | 0.611 | 1.000 | 577 |
| Ukraine | MI | PB | 0.064 | -0.018 | 0.145 | 1.539 | 0.622 | 577 |
| Ukraine | MAC | MC | 0.168 | 0.087 | 0.246 | 4.082 | 0.000 | 577 |
| Ukraine | MAC | PB | 0.020 | -0.062 | 0.101 | 0.474 | 1.000 | 577 |
| Ukraine | MC | PB | 0.136 | 0.055 | 0.215 | 3.297 | 0.007 | 577 |
| UK | SES | MI | -0.157 | -0.238 | -0.074 | -3.717 | 0.002 | 546 |
| UK | SES | MAC | 0.004 | -0.080 | 0.088 | 0.097 | 0.974 | 546 |
| UK | SES | MC | -0.030 | -0.113 | 0.054 | -0.695 | 0.974 | 547 |
| UK | SES | PB | -0.135 | -0.216 | -0.051 | -3.174 | 0.011 | 547 |
| UK | MI | MAC | 0.211 | 0.129 | 0.290 | 5.022 | 0.000 | 545 |
| UK | MI | MC | 0.123 | 0.039 | 0.204 | 2.883 | 0.025 | 546 |
| UK | MI | PB | 0.123 | 0.039 | 0.204 | 2.881 | 0.025 | 546 |
| UK | MAC | MC | 0.045 | -0.039 | 0.128 | 1.043 | 0.893 | 546 |
| UK | MAC | PB | 0.088 | 0.004 | 0.171 | 2.063 | 0.158 | 546 |
| UK | MC | PB | 0.192 | 0.110 | 0.272 | 4.574 | 0.000 | 547 |
| US | SES | MI | -0.367 | -0.410 | -0.321 | -15.046 | 0.000 | 1460 |
| US | SES | MAC | -0.238 | -0.285 | -0.189 | -9.341 | 0.000 | 1460 |
| US | SES | MC | 0.051 | 0.000 | 0.102 | 1.956 | 0.101 | 1467 |
| US | SES | PB | -0.123 | -0.173 | -0.073 | -4.755 | 0.000 | 1469 |
| US | MI | MAC | 0.539 | 0.502 | 0.575 | 24.408 | 0.000 | 1454 |
| US | MI | MC | 0.030 | -0.021 | 0.081 | 1.150 | 0.250 | 1458 |
| US | MI | PB | 0.130 | 0.080 | 0.181 | 5.025 | 0.000 | 1461 |
| US | MAC | MC | 0.093 | 0.042 | 0.144 | 3.568 | 0.001 | 1459 |
| US | MAC | PB | 0.129 | 0.078 | 0.179 | 4.961 | 0.000 | 1461 |
| US | MC | PB | 0.121 | 0.070 | 0.171 | 4.652 | 0.000 | 1467 |
| Uruguay | SES | MI | 0.009 | -0.279 | 0.296 | 0.063 | 1.000 | 47 |
| Uruguay | SES | MAC | 0.127 | -0.166 | 0.400 | 0.858 | 1.000 | 47 |
| Uruguay | SES | MC | 0.156 | -0.137 | 0.424 | 1.060 | 1.000 | 47 |
| Uruguay | SES | PB | 0.181 | -0.112 | 0.445 | 1.234 | 1.000 | 47 |
| Uruguay | MI | MAC | 0.130 | -0.163 | 0.402 | 0.880 | 1.000 | 47 |
| Uruguay | MI | MC | 0.335 | 0.053 | 0.568 | 2.387 | 0.212 | 47 |
| Uruguay | MI | PB | 0.015 | -0.274 | 0.300 | 0.098 | 1.000 | 47 |
| Uruguay | MAC | MC | 0.165 | -0.128 | 0.432 | 1.123 | 1.000 | 47 |
| Uruguay | MAC | PB | 0.072 | -0.219 | 0.352 | 0.487 | 1.000 | 47 |
| Uruguay | MC | PB | -0.003 | -0.290 | 0.284 | -0.023 | 1.000 | 47 |
| Venezuela | SES | MI | -0.173 | -0.373 | 0.043 | -1.589 | 1.000 | 84 |
| Venezuela | SES | MAC | -0.028 | -0.240 | 0.188 | -0.249 | 1.000 | 84 |
| Venezuela | SES | MC | 0.004 | -0.210 | 0.219 | 0.039 | 1.000 | 84 |
| Venezuela | SES | PB | -0.069 | -0.280 | 0.147 | -0.630 | 1.000 | 84 |
| Venezuela | MI | MAC | 0.142 | -0.074 | 0.346 | 1.303 | 1.000 | 84 |
| Venezuela | MI | MC | 0.121 | -0.096 | 0.327 | 1.105 | 1.000 | 84 |
| Venezuela | MI | PB | -0.168 | -0.369 | 0.048 | -1.542 | 1.000 | 84 |
| Venezuela | MAC | MC | 0.005 | -0.210 | 0.219 | 0.043 | 1.000 | 84 |
| Venezuela | MAC | PB | 0.060 | -0.157 | 0.271 | 0.541 | 1.000 | 84 |
| Venezuela | MC | PB | -0.046 | -0.258 | 0.170 | -0.416 | 1.000 | 84 |
| *Notes: SES = Socioeconomic status, MI = Moral Identity, MAC = Morality-as-Cooperation, MC = Moral Circle, PB = PB Behaviour. p-values adjusted using Holm (1979)* | | | | | | | | |
|  |

## 1.2. Region-level correlations

### 1.2.1. Table S2

| **Table S2 | Region-level correlations** | | | | | | | | |
| --- | --- | --- | --- | --- | --- | --- | --- | --- |
| ***Region*** | ***X*** | ***Y*** | ***r*** | ***95% CI Low*** | ***95% CI High*** | ***t*** | ***p*** | ***N*** |
| Africa | SES | MI | 0.019 | -0.026 | 0.064 | 0.821 | 1.000 | 1889 |
| Africa | SES | MAC | -0.042 | -0.086 | 0.002 | -1.857 | 0.572 | 1973 |
| Africa | SES | MC | -0.035 | -0.078 | 0.007 | -1.619 | 0.740 | 2096 |
| Africa | SES | PB | -0.096 | -0.137 | -0.055 | -4.574 | 0.000 | 2257 |
| Africa | SES | GINI | -0.203 | -0.242 | -0.163 | -9.854 | 0.000 | 2261 |
| Africa | MI | MAC | 0.389 | 0.349 | 0.427 | 17.967 | 0.000 | 1812 |
| Africa | MI | MC | 0.000 | -0.045 | 0.046 | 0.020 | 1.000 | 1871 |
| Africa | MI | PB | 0.003 | -0.041 | 0.048 | 0.149 | 1.000 | 1914 |
| Africa | MI | GINI | 0.033 | -0.012 | 0.078 | 1.441 | 0.899 | 1915 |
| Africa | MAC | MC | 0.004 | -0.040 | 0.049 | 0.185 | 1.000 | 1921 |
| Africa | MAC | PB | -0.041 | -0.085 | 0.003 | -1.828 | 0.572 | 1998 |
| Africa | MAC | GINI | -0.031 | -0.074 | 0.013 | -1.367 | 0.899 | 1999 |
| Africa | MC | PB | 0.097 | 0.055 | 0.139 | 4.506 | 0.000 | 2126 |
| Africa | MC | GINI | 0.103 | 0.061 | 0.145 | 4.779 | 0.000 | 2127 |
| Africa | PB | GINI | 0.050 | 0.010 | 0.091 | 2.444 | 0.146 | 2356 |
| Americas | SES | MI | -0.159 | -0.180 | -0.137 | -14.367 | 0.000 | 7964 |
| Americas | SES | MAC | -0.091 | -0.113 | -0.069 | -8.130 | 0.000 | 7853 |
| Americas | SES | MC | 0.006 | -0.016 | 0.028 | 0.515 | 0.606 | 8034 |
| Americas | SES | PB | -0.116 | -0.137 | -0.094 | -10.480 | 0.000 | 8060 |
| Americas | SES | GINI | -0.112 | -0.133 | -0.090 | -10.076 | 0.000 | 8060 |
| Americas | MI | MAC | 0.275 | 0.255 | 0.296 | 25.260 | 0.000 | 7788 |
| Americas | MI | MC | 0.052 | 0.030 | 0.074 | 4.660 | 0.000 | 7942 |
| Americas | MI | PB | 0.057 | 0.035 | 0.079 | 5.118 | 0.000 | 7966 |
| Americas | MI | GINI | 0.065 | 0.043 | 0.086 | 5.776 | 0.000 | 7966 |
| Americas | MAC | MC | 0.079 | 0.057 | 0.101 | 7.018 | 0.000 | 7833 |
| Americas | MAC | PB | 0.050 | 0.028 | 0.072 | 4.471 | 0.000 | 7857 |
| Americas | MAC | GINI | 0.103 | 0.082 | 0.125 | 9.220 | 0.000 | 7857 |
| Americas | MC | PB | 0.129 | 0.108 | 0.151 | 11.672 | 0.000 | 8037 |
| Americas | MC | GINI | 0.078 | 0.056 | 0.099 | 6.986 | 0.000 | 8037 |
| Americas | PB | GINI | 0.129 | 0.107 | 0.150 | 11.682 | 0.000 | 8068 |
| Asia | SES | MI | -0.191 | -0.211 | -0.172 | -18.909 | 0.000 | 9401 |
| Asia | SES | MAC | -0.137 | -0.157 | -0.117 | -13.448 | 0.000 | 9418 |
| Asia | SES | MC | 0.000 | -0.020 | 0.020 | 0.004 | 0.996 | 9526 |
| Asia | SES | PB | -0.101 | -0.121 | -0.081 | -9.907 | 0.000 | 9556 |
| Asia | SES | GINI | -0.089 | -0.108 | -0.069 | -8.688 | 0.000 | 9556 |
| Asia | MI | MAC | 0.355 | 0.337 | 0.372 | 36.710 | 0.000 | 9353 |
| Asia | MI | MC | 0.082 | 0.062 | 0.103 | 8.028 | 0.000 | 9413 |
| Asia | MI | PB | 0.141 | 0.121 | 0.161 | 13.819 | 0.000 | 9442 |
| Asia | MI | GINI | 0.099 | 0.079 | 0.118 | 9.620 | 0.000 | 9442 |
| Asia | MAC | MC | 0.096 | 0.076 | 0.116 | 9.340 | 0.000 | 9433 |
| Asia | MAC | PB | 0.140 | 0.121 | 0.160 | 13.807 | 0.000 | 9471 |
| Asia | MAC | GINI | 0.198 | 0.179 | 0.217 | 19.658 | 0.000 | 9471 |
| Asia | MC | PB | 0.152 | 0.133 | 0.172 | 15.077 | 0.000 | 9572 |
| Asia | MC | GINI | 0.101 | 0.081 | 0.121 | 9.907 | 0.000 | 9572 |
| Asia | PB | GINI | 0.010 | -0.010 | 0.030 | 0.947 | 0.687 | 9633 |
| Europe | SES | MI | -0.075 | -0.087 | -0.062 | -11.397 | 0.000 | 23187 |
| Europe | SES | MAC | -0.004 | -0.016 | 0.009 | -0.537 | 1.000 | 23299 |
| Europe | SES | MC | -0.006 | -0.019 | 0.006 | -0.988 | 1.000 | 23528 |
| Europe | SES | PB | -0.094 | -0.106 | -0.081 | -14.437 | 0.000 | 23621 |
| Europe | SES | GINI | 0.029 | 0.016 | 0.041 | 4.408 | 0.000 | 23621 |
| Europe | MI | MAC | 0.237 | 0.225 | 0.250 | 37.027 | 0.000 | 22959 |
| Europe | MI | MC | 0.079 | 0.066 | 0.091 | 11.985 | 0.000 | 23123 |
| Europe | MI | PB | 0.106 | 0.094 | 0.119 | 16.286 | 0.000 | 23199 |
| Europe | MI | GINI | 0.020 | 0.007 | 0.033 | 3.092 | 0.010 | 23199 |
| Europe | MAC | MC | 0.060 | 0.047 | 0.073 | 9.139 | 0.000 | 23231 |
| Europe | MAC | PB | 0.071 | 0.058 | 0.083 | 10.799 | 0.000 | 23313 |
| Europe | MAC | GINI | 0.124 | 0.112 | 0.137 | 19.105 | 0.000 | 23313 |
| Europe | MC | PB | 0.136 | 0.124 | 0.149 | 21.120 | 0.000 | 23540 |
| Europe | MC | GINI | -0.005 | -0.018 | 0.008 | -0.790 | 1.000 | 23540 |
| Europe | PB | GINI | 0.005 | -0.008 | 0.018 | 0.757 | 1.000 | 23637 |
| Oceania | SES | MI | -0.279 | -0.314 | -0.244 | -14.918 | 0.000 | 2630 |
| Oceania | SES | MAC | -0.169 | -0.206 | -0.132 | -8.819 | 0.000 | 2638 |
| Oceania | SES | MC | 0.027 | -0.011 | 0.065 | 1.381 | 0.837 | 2647 |
| Oceania | SES | PB | -0.114 | -0.152 | -0.077 | -5.928 | 0.000 | 2648 |
| Oceania | SES | GINI | -0.002 | -0.040 | 0.036 | -0.110 | 1.000 | 2648 |
| Oceania | MI | MAC | 0.408 | 0.376 | 0.440 | 22.906 | 0.000 | 2625 |
| Oceania | MI | MC | 0.030 | -0.008 | 0.068 | 1.542 | 0.740 | 2630 |
| Oceania | MI | PB | 0.154 | 0.116 | 0.191 | 7.974 | 0.000 | 2632 |
| Oceania | MI | GINI | 0.023 | -0.015 | 0.061 | 1.193 | 0.933 | 2632 |
| Oceania | MAC | MC | 0.049 | 0.011 | 0.087 | 2.518 | 0.083 | 2638 |
| Oceania | MAC | PB | 0.107 | 0.069 | 0.145 | 5.530 | 0.000 | 2639 |
| Oceania | MAC | GINI | -0.007 | -0.045 | 0.031 | -0.362 | 1.000 | 2639 |
| Oceania | MC | PB | 0.074 | 0.036 | 0.112 | 3.814 | 0.001 | 2648 |
| Oceania | MC | GINI | -0.007 | -0.045 | 0.031 | -0.351 | 1.000 | 2648 |
| Oceania | PB | GINI | -0.104 | -0.141 | -0.066 | -5.378 | 0.000 | 2650 |
| *Notes: SES = Socioeconomic status, GINI = Gini Coefficient, MI = Moral Identity, MAC = Morality-as-Cooperation, MC = Moral Circle, PB = Behaviour. p-values adjusted using Holm (1979)* | | | | | | | | |
|  |

# 2. Linear Mixed Effects Models [Imputed Data]

## 2.1. All models

### 2.1.1. Table S3

| **Table S3 | Multilevel models using imputed data** | | | | | | | | |
| --- | --- | --- | --- | --- | --- | --- | --- | --- |
|  | **Moral Identity** | | **Morality-as-Cooperation** | | **Moral Circle** | | **Prosocial Behavior** | |
| *Predictors* | *std. Beta* | *std. p* | *std. Beta* | *std. p* | *std. Beta* | *std. p* | *std. Beta* | *std. p* |
| Subjective SES | -0.13 (-0.14 – -0.12) | **<0.001** | -0.07 (-0.08 – -0.06) | **<0.001** | 0.01 (0.01 – 0.02) | **0.002** | -0.08 (-0.09 – -0.08) | **<0.001** |
| GINI Index | 0.13 (0.05 – 0.21) | **0.001** | 0.03 (-0.04 – 0.10) | 0.337 | 0.09 (0.03 – 0.14) | **0.001** | 0.04 (-0.02 – 0.11) | 0.208 |
| Gender | 0.05 (0.05 – 0.06) | **<0.001** | 0.04 (0.04 – 0.05) | **<0.001** | 0.09 (0.08 – 0.10) | **<0.001** | 0.08 (0.07 – 0.08) | **<0.001** |
| Age | 0.04 (0.03 – 0.05) | **<0.001** | 0.01 (0.00 – 0.02) | **0.031** | 0.07 (0.06 – 0.08) | **<0.001** | 0.05 (0.04 – 0.05) | **<0.001** |
| SES x GINI | -0.00 (-0.01 – 0.01) | 0.718 | -0.01 (-0.02 – -0.00) | **0.011** | -0.00 (-0.01 – 0.01) | 0.868 | 0.00 (-0.01 – 0.01) | 0.989 |
| **Random Effects** | | | | | | | | |
| σ2 | 174.82 | | 120.93 | | 25.70 | | 1149.62 | |
| τ00 | 21.35 country_name | | 10.90 country_name | | 1.23 country_name | | 95.17 country_name | |
| ICC | 0.11 | | 0.08 | | 0.05 | | 0.08 | |
| N | 67 country_name | | 67 country_name | | 67 country_name | | 67 country_name | |
| Observations | 46247 | | 46247 | | 46247 | | 46247 | |
| Marginal R2 / Conditional R2 | 0.039 / 0.144 | | 0.009 / 0.091 | | 0.018 / 0.063 | | 0.016 / 0.091 | |
| AIC | 370353.921 | | 353293.494 | | 281647.319 | | 457421.782 | |

# 3. Nested Ordinary Least Squares Regression Results

## 3.1. Moral Identity

### 3.1.1. Table S4

| **Table S4 | Nested OLS regression results** | | | | | | |
| --- | --- | --- | --- | --- | --- | --- |
| *Country* | *DV* | *IV* | *Estimate* | *SE* | *t* | *p* |
| Argentina | MI | SES | -0.439 | 0.331 | -1.327 | 0.185 |
| Australia | MI | SES | -2.007 | 0.143 | -14.061 | 0.000 |
| Austria | MI | SES | -0.226 | 0.209 | -1.082 | 0.280 |
| Belgium | MI | SES | -0.399 | 0.213 | -1.874 | 0.061 |
| Bangladesh | MI | SES | -1.135 | 0.367 | -3.090 | 0.002 |
| Bulgaria | MI | SES | -1.290 | 0.434 | -2.974 | 0.003 |
| Bolivia | MI | SES | -2.443 | 1.124 | -2.173 | 0.037 |
| Brazil | MI | SES | -0.616 | 0.179 | -3.444 | 0.001 |
| Canada | MI | SES | -1.110 | 0.227 | -4.897 | 0.000 |
| Switzerland | MI | SES | -0.727 | 0.219 | -3.325 | 0.001 |
| Chile | MI | SES | 0.005 | 0.806 | 0.006 | 0.995 |
| China | MI | SES | -0.329 | 0.252 | -1.306 | 0.192 |
| Colombia | MI | SES | -0.842 | 0.267 | -3.155 | 0.002 |
| Costa Rica | MI | SES | -1.665 | 1.855 | -0.897 | 0.379 |
| Cuba | MI | SES | 0.612 | 1.158 | 0.529 | 0.600 |
| Germany | MI | SES | -1.359 | 0.226 | -6.019 | 0.000 |
| Denmark | MI | SES | -0.400 | 0.346 | -1.154 | 0.249 |
| Dominican Republic | MI | SES | -2.670 | 1.522 | -1.754 | 0.089 |
| Ecuador | MI | SES | 0.267 | 0.724 | 0.369 | 0.713 |
| Spain | MI | SES | -0.569 | 0.232 | -2.451 | 0.014 |
| Finland | MI | SES | -0.694 | 0.223 | -3.116 | 0.002 |
| France | MI | SES | -1.770 | 0.214 | -8.267 | 0.000 |
| United Kingdom | MI | SES | -1.106 | 0.297 | -3.717 | 0.000 |
| Ghana | MI | SES | -0.362 | 0.907 | -0.399 | 0.690 |
| Greece | MI | SES | -0.615 | 0.288 | -2.133 | 0.033 |
| Guatemala | MI | SES | -2.598 | 1.372 | -1.893 | 0.065 |
| Honduras | MI | SES | 1.354 | 1.310 | 1.034 | 0.313 |
| Croatia | MI | SES | -0.533 | 0.344 | -1.551 | 0.121 |
| Hungary | MI | SES | -0.787 | 0.386 | -2.040 | 0.042 |
| India | MI | SES | -0.693 | 0.279 | -2.489 | 0.013 |
| Ireland | MI | SES | 0.093 | 0.268 | 0.346 | 0.730 |
| Iraq | MI | SES | 0.203 | 0.233 | 0.873 | 0.383 |
| Israel | MI | SES | -0.688 | 0.194 | -3.549 | 0.000 |
| Italy | MI | SES | -1.292 | 0.205 | -6.311 | 0.000 |
| Japan | MI | SES | -1.834 | 0.183 | -9.998 | 0.000 |
| South Korea | MI | SES | -1.071 | 0.246 | -4.359 | 0.000 |
| Latvia | MI | SES | 0.799 | 0.225 | 3.556 | 0.000 |
| Morocco | MI | SES | -0.324 | 0.349 | -0.927 | 0.354 |
| Mexico | MI | SES | -0.697 | 0.244 | -2.855 | 0.004 |
| North Macedonia | MI | SES | -0.941 | 0.308 | -3.056 | 0.002 |
| Nigeria | MI | SES | -0.897 | 0.290 | -3.093 | 0.002 |
| Nicaragua | MI | SES | -3.090 | 1.765 | -1.751 | 0.102 |
| Netherlands | MI | SES | -0.255 | 0.198 | -1.283 | 0.200 |
| Norway | MI | SES | -0.613 | 0.289 | -2.123 | 0.034 |
| Nepal | MI | SES | -1.016 | 0.370 | -2.746 | 0.006 |
| New Zealand | MI | SES | -1.389 | 0.277 | -5.013 | 0.000 |
| Pakistan | MI | SES | -0.396 | 0.328 | -1.207 | 0.228 |
| Panama | MI | SES | -1.006 | 2.313 | -0.435 | 0.670 |
| Peru | MI | SES | 1.063 | 0.863 | 1.233 | 0.221 |
| Philippines | MI | SES | -2.073 | 0.334 | -6.211 | 0.000 |
| Poland | MI | SES | -1.152 | 0.173 | -6.672 | 0.000 |
| Paraguay | MI | SES | 1.479 | 1.635 | 0.905 | 0.374 |
| Romania | MI | SES | -0.690 | 0.361 | -1.913 | 0.056 |
| Russia | MI | SES | 1.081 | 0.371 | 2.911 | 0.004 |
| Senegal | MI | SES | 0.354 | 0.439 | 0.806 | 0.421 |
| Singapore | MI | SES | -1.817 | 0.292 | -6.217 | 0.000 |
| El Salvador | MI | SES | -5.564 | 2.137 | -2.604 | 0.015 |
| Serbia | MI | SES | -0.745 | 0.326 | -2.287 | 0.023 |
| Slovakia | MI | SES | -1.275 | 0.256 | -4.984 | 0.000 |
| Sweden | MI | SES | -0.249 | 0.179 | -1.393 | 0.164 |
| Turkey | MI | SES | -2.088 | 0.193 | -10.799 | 0.000 |
| Taiwan | MI | SES | -1.617 | 0.274 | -5.893 | 0.000 |
| Ukraine | MI | SES | -2.044 | 0.378 | -5.411 | 0.000 |
| Uruguay | MI | SES | 0.104 | 1.653 | 0.063 | 0.950 |
| United States | MI | SES | -2.540 | 0.169 | -15.046 | 0.000 |
| Venezuela | MI | SES | -1.350 | 0.849 | -1.589 | 0.116 |
| South Africa | MI | SES | 0.856 | 0.355 | 2.413 | 0.016 |
| *Note: MI = Moral Identity, SES = Socioeconomic status* | | | | | | |

### 3.1.2. Figure S1


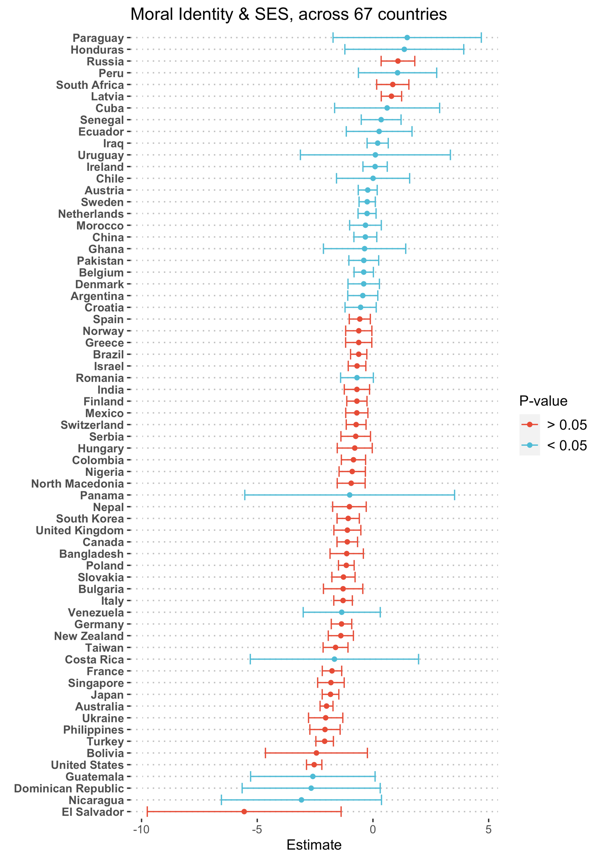


## 3.2. Morality-as-Cooperation

### 3.2.1. Table S5

| **Table S5 | Nested OLS regression results** | | | | | | |
| --- | --- | --- | --- | --- | --- | --- |
| *Country* | *DV* | *IV* | *Estimate* | *SE* | *t* | *p* |
| Argentina | MAC | SES | 0.049 | 0.261 | 0.188 | 0.851 |
| Australia | MAC | SES | -0.982 | 0.111 | -8.820 | 0.000 |
| Austria | MAC | SES | 0.217 | 0.192 | 1.132 | 0.258 |
| Belgium | MAC | SES | -0.179 | 0.181 | -0.990 | 0.323 |
| Bangladesh | MAC | SES | -0.682 | 0.265 | -2.570 | 0.011 |
| Bulgaria | MAC | SES | 0.021 | 0.331 | 0.063 | 0.950 |
| Bolivia | MAC | SES | -0.661 | 0.900 | -0.734 | 0.468 |
| Brazil | MAC | SES | -0.390 | 0.159 | -2.451 | 0.014 |
| Canada | MAC | SES | -0.467 | 0.201 | -2.321 | 0.021 |
| Switzerland | MAC | SES | -0.019 | 0.174 | -0.112 | 0.911 |
| Chile | MAC | SES | 0.324 | 0.616 | 0.526 | 0.600 |
| China | MAC | SES | 0.045 | 0.229 | 0.197 | 0.844 |
| Colombia | MAC | SES | -0.276 | 0.260 | -1.061 | 0.289 |
| Costa Rica | MAC | SES | -0.118 | 1.641 | -0.072 | 0.943 |
| Cuba | MAC | SES | -0.803 | 0.637 | -1.260 | 0.215 |
| Germany | MAC | SES | -0.264 | 0.173 | -1.520 | 0.129 |
| Denmark | MAC | SES | -0.310 | 0.296 | -1.049 | 0.295 |
| Dominican Republic | MAC | SES | 1.731 | 1.481 | 1.168 | 0.251 |
| Ecuador | MAC | SES | -0.107 | 0.518 | -0.207 | 0.836 |
| Spain | MAC | SES | 0.045 | 0.201 | 0.225 | 0.822 |
| Finland | MAC | SES | 0.054 | 0.172 | 0.311 | 0.756 |
| France | MAC | SES | -0.488 | 0.155 | -3.152 | 0.002 |
| United Kingdom | MAC | SES | 0.025 | 0.255 | 0.097 | 0.923 |
| Ghana | MAC | SES | -0.438 | 0.670 | -0.653 | 0.514 |
| Greece | MAC | SES | -0.528 | 0.226 | -2.339 | 0.020 |
| Guatemala | MAC | SES | -1.318 | 1.066 | -1.237 | 0.223 |
| Honduras | MAC | SES | -0.848 | 1.151 | -0.736 | 0.469 |
| Croatia | MAC | SES | 0.098 | 0.277 | 0.354 | 0.724 |
| Hungary | MAC | SES | -0.156 | 0.254 | -0.616 | 0.538 |
| India | MAC | SES | -1.660 | 0.256 | -6.475 | 0.000 |
| Ireland | MAC | SES | 0.197 | 0.263 | 0.751 | 0.453 |
| Iraq | MAC | SES | -0.203 | 0.211 | -0.961 | 0.337 |
| Israel | MAC | SES | -0.094 | 0.200 | -0.472 | 0.637 |
| Italy | MAC | SES | -0.884 | 0.147 | -6.001 | 0.000 |
| Japan | MAC | SES | -1.033 | 0.118 | -8.769 | 0.000 |
| South Korea | MAC | SES | -0.632 | 0.194 | -3.248 | 0.001 |
| Latvia | MAC | SES | 0.025 | 0.195 | 0.129 | 0.898 |
| Morocco | MAC | SES | -0.193 | 0.247 | -0.782 | 0.434 |
| Mexico | MAC | SES | -0.338 | 0.197 | -1.710 | 0.087 |
| North Macedonia | MAC | SES | -0.919 | 0.305 | -3.009 | 0.003 |
| Nigeria | MAC | SES | -0.719 | 0.289 | -2.484 | 0.013 |
| Nicaragua | MAC | SES | -1.672 | 0.833 | -2.008 | 0.064 |
| Netherlands | MAC | SES | -0.018 | 0.166 | -0.109 | 0.913 |
| Norway | MAC | SES | 0.187 | 0.264 | 0.707 | 0.480 |
| Nepal | MAC | SES | -1.081 | 0.355 | -3.042 | 0.003 |
| New Zealand | MAC | SES | -0.531 | 0.256 | -2.074 | 0.039 |
| Pakistan | MAC | SES | 0.015 | 0.265 | 0.056 | 0.955 |
| Panama | MAC | SES | -0.584 | 1.445 | -0.404 | 0.692 |
| Peru | MAC | SES | -0.555 | 0.605 | -0.917 | 0.361 |
| Philippines | MAC | SES | -1.498 | 0.301 | -4.980 | 0.000 |
| Poland | MAC | SES | -0.391 | 0.143 | -2.737 | 0.006 |
| Paraguay | MAC | SES | -1.072 | 0.779 | -1.376 | 0.182 |
| Romania | MAC | SES | 0.136 | 0.249 | 0.548 | 0.584 |
| Russia | MAC | SES | -0.049 | 0.308 | -0.159 | 0.874 |
| Senegal | MAC | SES | -0.081 | 0.327 | -0.248 | 0.804 |
| Singapore | MAC | SES | -0.622 | 0.240 | -2.587 | 0.010 |
| El Salvador | MAC | SES | 0.154 | 1.484 | 0.104 | 0.918 |
| Serbia | MAC | SES | -0.624 | 0.298 | -2.091 | 0.037 |
| Slovakia | MAC | SES | -0.321 | 0.187 | -1.711 | 0.087 |
| Sweden | MAC | SES | -0.229 | 0.154 | -1.488 | 0.137 |
| Turkey | MAC | SES | -0.500 | 0.145 | -3.449 | 0.001 |
| Taiwan | MAC | SES | -0.598 | 0.247 | -2.417 | 0.016 |
| Ukraine | MAC | SES | -0.285 | 0.302 | -0.944 | 0.345 |
| Uruguay | MAC | SES | 1.142 | 1.331 | 0.858 | 0.395 |
| United States | MAC | SES | -1.257 | 0.135 | -9.341 | 0.000 |
| Venezuela | MAC | SES | -0.132 | 0.530 | -0.249 | 0.804 |
| South Africa | MAC | SES | -0.141 | 0.396 | -0.357 | 0.722 |
| *Note: MAC = Morality-as-Cooperation, SES = Socioeconomic status* | | | | | | |

### 3.2.1. Figure S2


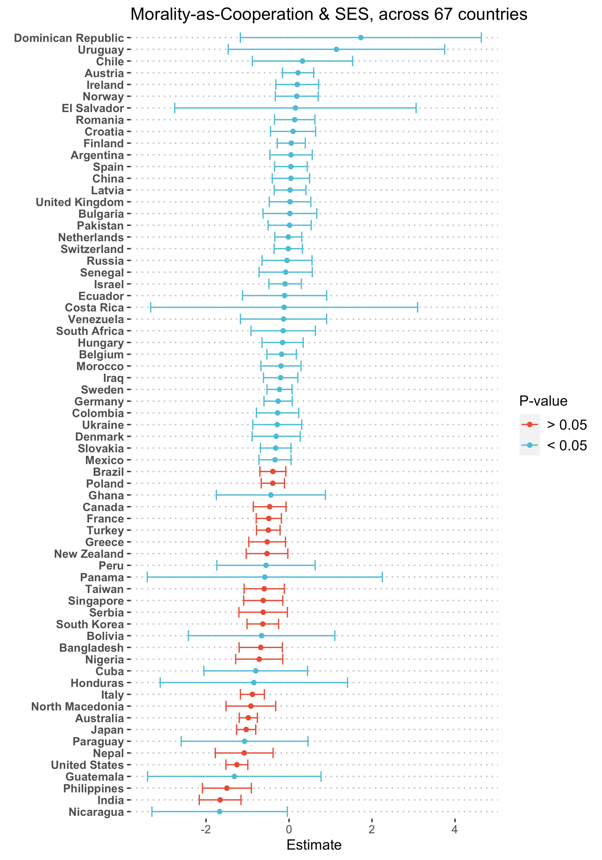


## 3.3 Moral Circle

### 3.3.1. Table S6

| **Table S6 | Nested OLS regression results** | | | | | | |
| --- | --- | --- | --- | --- | --- | --- |
| *Country* | *DV* | *IV* | *Estimate* | *SE* | *t* | *p* |
| Argentina | MC | SES | -0.030 | 0.118 | -0.251 | 0.802 |
| Australia | MC | SES | 0.068 | 0.057 | 1.200 | 0.230 |
| Austria | MC | SES | 0.153 | 0.075 | 2.031 | 0.042 |
| Belgium | MC | SES | 0.203 | 0.095 | 2.134 | 0.033 |
| Bangladesh | MC | SES | 0.414 | 0.133 | 3.116 | 0.002 |
| Bulgaria | MC | SES | 0.029 | 0.153 | 0.192 | 0.848 |
| Bolivia | MC | SES | 0.652 | 0.459 | 1.422 | 0.164 |
| Brazil | MC | SES | 0.007 | 0.069 | 0.097 | 0.923 |
| Canada | MC | SES | 0.087 | 0.096 | 0.904 | 0.366 |
| Switzerland | MC | SES | 0.159 | 0.091 | 1.756 | 0.079 |
| Chile | MC | SES | 0.219 | 0.287 | 0.764 | 0.447 |
| China | MC | SES | -0.066 | 0.075 | -0.881 | 0.379 |
| Colombia | MC | SES | 0.043 | 0.099 | 0.436 | 0.663 |
| Costa Rica | MC | SES | 0.695 | 0.824 | 0.843 | 0.408 |
| Cuba | MC | SES | 0.366 | 0.394 | 0.929 | 0.359 |
| Germany | MC | SES | -0.068 | 0.080 | -0.841 | 0.400 |
| Denmark | MC | SES | 0.178 | 0.125 | 1.421 | 0.156 |
| Dominican Republic | MC | SES | -0.153 | 0.608 | -0.252 | 0.803 |
| Ecuador | MC | SES | 0.149 | 0.281 | 0.529 | 0.598 |
| Spain | MC | SES | 0.090 | 0.092 | 0.976 | 0.329 |
| Finland | MC | SES | -0.104 | 0.075 | -1.382 | 0.167 |
| France | MC | SES | 0.053 | 0.086 | 0.614 | 0.539 |
| United Kingdom | MC | SES | -0.084 | 0.120 | -0.695 | 0.487 |
| Ghana | MC | SES | -0.294 | 0.224 | -1.314 | 0.191 |
| Greece | MC | SES | 0.048 | 0.132 | 0.362 | 0.717 |
| Guatemala | MC | SES | 0.510 | 0.447 | 1.141 | 0.260 |
| Honduras | MC | SES | 0.654 | 0.563 | 1.161 | 0.258 |
| Croatia | MC | SES | -0.087 | 0.146 | -0.598 | 0.550 |
| Hungary | MC | SES | 0.210 | 0.136 | 1.541 | 0.124 |
| India | MC | SES | 0.027 | 0.092 | 0.299 | 0.765 |
| Ireland | MC | SES | -0.041 | 0.108 | -0.379 | 0.705 |
| Iraq | MC | SES | -0.023 | 0.097 | -0.238 | 0.812 |
| Israel | MC | SES | 0.289 | 0.080 | 3.613 | 0.000 |
| Italy | MC | SES | -0.030 | 0.081 | -0.366 | 0.714 |
| Japan | MC | SES | -0.064 | 0.068 | -0.948 | 0.343 |
| South Korea | MC | SES | -0.209 | 0.088 | -2.360 | 0.019 |
| Latvia | MC | SES | 0.060 | 0.100 | 0.603 | 0.547 |
| Morocco | MC | SES | 0.094 | 0.140 | 0.670 | 0.503 |
| Mexico | MC | SES | -0.060 | 0.090 | -0.670 | 0.503 |
| North Macedonia | MC | SES | -0.089 | 0.120 | -0.742 | 0.458 |
| Nigeria | MC | SES | 0.173 | 0.120 | 1.437 | 0.151 |
| Nicaragua | MC | SES | 0.114 | 0.666 | 0.171 | 0.866 |
| Netherlands | MC | SES | 0.234 | 0.075 | 3.135 | 0.002 |
| Norway | MC | SES | 0.140 | 0.113 | 1.240 | 0.215 |
| Nepal | MC | SES | 0.002 | 0.166 | 0.013 | 0.989 |
| New Zealand | MC | SES | 0.081 | 0.117 | 0.691 | 0.490 |
| Pakistan | MC | SES | -0.079 | 0.134 | -0.592 | 0.554 |
| Panama | MC | SES | -0.736 | 0.482 | -1.526 | 0.148 |
| Peru | MC | SES | 0.108 | 0.316 | 0.343 | 0.733 |
| Philippines | MC | SES | 0.294 | 0.150 | 1.959 | 0.051 |
| Poland | MC | SES | -0.069 | 0.073 | -0.944 | 0.345 |
| Paraguay | MC | SES | -0.054 | 0.542 | -0.100 | 0.921 |
| Romania | MC | SES | 0.028 | 0.144 | 0.197 | 0.844 |
| Russia | MC | SES | 0.178 | 0.131 | 1.357 | 0.175 |
| Senegal | MC | SES | -0.189 | 0.131 | -1.437 | 0.152 |
| Singapore | MC | SES | 0.043 | 0.134 | 0.323 | 0.747 |
| El Salvador | MC | SES | -0.349 | 0.732 | -0.477 | 0.638 |
| Serbia | MC | SES | -0.148 | 0.108 | -1.373 | 0.170 |
| Slovakia | MC | SES | 0.182 | 0.094 | 1.946 | 0.052 |
| Sweden | MC | SES | 0.211 | 0.068 | 3.105 | 0.002 |
| Turkey | MC | SES | 0.031 | 0.069 | 0.451 | 0.652 |
| Taiwan | MC | SES | -0.095 | 0.089 | -1.066 | 0.287 |
| Ukraine | MC | SES | -0.087 | 0.143 | -0.606 | 0.545 |
| Uruguay | MC | SES | 0.671 | 0.634 | 1.060 | 0.295 |
| United States | MC | SES | 0.114 | 0.058 | 1.956 | 0.051 |
| Venezuela | MC | SES | 0.011 | 0.291 | 0.039 | 0.969 |
| South Africa | MC | SES | -0.016 | 0.119 | -0.131 | 0.896 |
| *Note: MC = Moral Circle, SES = Socioeconomic status* | | | | | | |

### 3.3.2. Figure S3


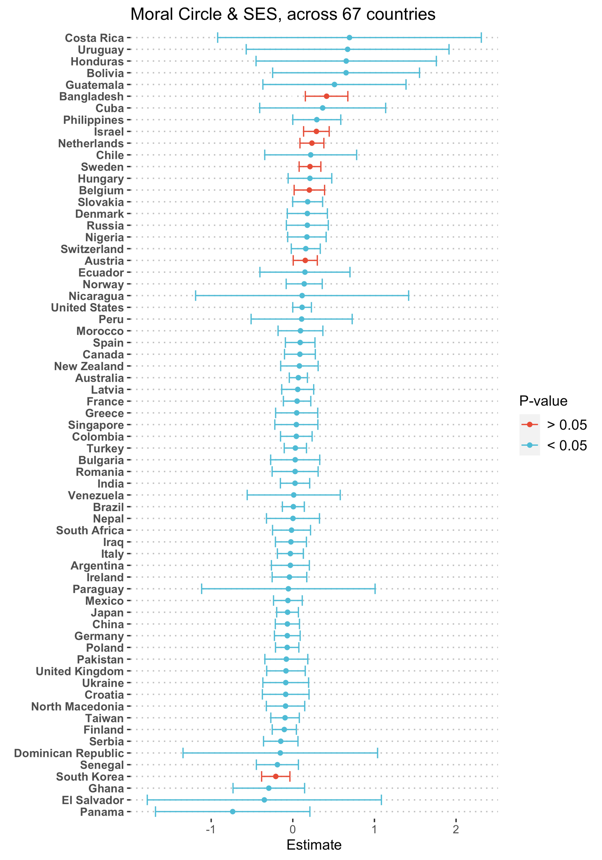


## 3.4. Prosocial Behaviour

### 3.3.1. Table S7

| **Table S7 | Nested OLS regression results** | | | | | | |
| --- | --- | --- | --- | --- | --- | --- |
| *Country* | *DV* | *IV* | *Estimate* | *SE* | *t* | *p* |
| Argentina | PB | SES | -1.455 | 0.887 | -1.640 | 0.102 |
| Australia | PB | SES | -2.123 | 0.345 | -6.155 | 0.000 |
| Austria | PB | SES | -2.263 | 0.576 | -3.930 | 0.000 |
| Belgium | PB | SES | -1.287 | 0.691 | -1.862 | 0.063 |
| Bangladesh | PB | SES | 3.028 | 0.687 | 4.406 | 0.000 |
| Bulgaria | PB | SES | -1.866 | 0.915 | -2.040 | 0.042 |
| Bolivia | PB | SES | 2.520 | 3.402 | 0.741 | 0.464 |
| Brazil | PB | SES | -1.782 | 0.414 | -4.300 | 0.000 |
| Canada | PB | SES | -1.675 | 0.664 | -2.521 | 0.012 |
| Switzerland | PB | SES | -3.380 | 0.533 | -6.344 | 0.000 |
| Chile | PB | SES | -3.378 | 2.379 | -1.420 | 0.159 |
| China | PB | SES | 1.162 | 0.730 | 1.591 | 0.112 |
| Colombia | PB | SES | -2.717 | 0.674 | -4.030 | 0.000 |
| Costa Rica | PB | SES | 0.325 | 5.620 | 0.058 | 0.954 |
| Cuba | PB | SES | 0.156 | 2.641 | 0.059 | 0.953 |
| Germany | PB | SES | -2.571 | 0.553 | -4.650 | 0.000 |
| Denmark | PB | SES | -0.671 | 0.766 | -0.877 | 0.381 |
| Dominican Republic | PB | SES | -1.561 | 3.877 | -0.403 | 0.690 |
| Ecuador | PB | SES | -2.985 | 1.679 | -1.778 | 0.078 |
| Spain | PB | SES | -1.875 | 0.688 | -2.724 | 0.007 |
| Finland | PB | SES | -3.899 | 0.743 | -5.244 | 0.000 |
| France | PB | SES | -2.622 | 0.562 | -4.662 | 0.000 |
| United Kingdom | PB | SES | -2.653 | 0.836 | -3.174 | 0.002 |
| Ghana | PB | SES | -0.477 | 0.780 | -0.611 | 0.542 |
| Greece | PB | SES | -0.365 | 0.869 | -0.420 | 0.675 |
| Guatemala | PB | SES | -3.027 | 2.982 | -1.015 | 0.316 |
| Honduras | PB | SES | -2.968 | 3.473 | -0.855 | 0.402 |
| Croatia | PB | SES | -1.767 | 0.909 | -1.944 | 0.053 |
| Hungary | PB | SES | -2.302 | 0.962 | -2.392 | 0.017 |
| India | PB | SES | -3.916 | 0.631 | -6.201 | 0.000 |
| Ireland | PB | SES | -0.143 | 0.564 | -0.254 | 0.799 |
| Iraq | PB | SES | -0.605 | 0.542 | -1.115 | 0.265 |
| Israel | PB | SES | -0.981 | 0.554 | -1.771 | 0.077 |
| Italy | PB | SES | -2.237 | 0.473 | -4.728 | 0.000 |
| Japan | PB | SES | -2.183 | 0.426 | -5.123 | 0.000 |
| South Korea | PB | SES | -2.043 | 0.692 | -2.952 | 0.003 |
| Latvia | PB | SES | 1.838 | 0.624 | 2.947 | 0.003 |
| Morocco | PB | SES | -2.604 | 0.710 | -3.668 | 0.000 |
| Mexico | PB | SES | -1.228 | 0.594 | -2.068 | 0.039 |
| North Macedonia | PB | SES | 0.407 | 0.757 | 0.538 | 0.591 |
| Nigeria | PB | SES | -0.780 | 0.565 | -1.380 | 0.168 |
| Nicaragua | PB | SES | -7.499 | 4.052 | -1.851 | 0.085 |
| Netherlands | PB | SES | -2.723 | 0.599 | -4.549 | 0.000 |
| Norway | PB | SES | -2.446 | 1.005 | -2.433 | 0.015 |
| Nepal | PB | SES | 1.258 | 0.931 | 1.351 | 0.178 |
| New Zealand | PB | SES | -0.811 | 0.774 | -1.048 | 0.295 |
| Pakistan | PB | SES | -0.049 | 0.749 | -0.065 | 0.948 |
| Panama | PB | SES | -5.223 | 4.590 | -1.138 | 0.273 |
| Peru | PB | SES | -0.131 | 2.276 | -0.057 | 0.954 |
| Philippines | PB | SES | -0.743 | 0.745 | -0.998 | 0.319 |
| Poland | PB | SES | -0.990 | 0.428 | -2.313 | 0.021 |
| Paraguay | PB | SES | -8.107 | 3.745 | -2.164 | 0.041 |
| Romania | PB | SES | 0.214 | 0.866 | 0.247 | 0.805 |
| Russia | PB | SES | 2.160 | 0.905 | 2.387 | 0.017 |
| Senegal | PB | SES | 0.185 | 0.772 | 0.240 | 0.811 |
| Singapore | PB | SES | 0.009 | 0.819 | 0.011 | 0.991 |
| El Salvador | PB | SES | -2.145 | 4.707 | -0.456 | 0.652 |
| Serbia | PB | SES | -0.378 | 0.859 | -0.440 | 0.660 |
| Slovakia | PB | SES | -0.991 | 0.618 | -1.603 | 0.109 |
| Sweden | PB | SES | -1.748 | 0.591 | -2.957 | 0.003 |
| Turkey | PB | SES | -1.920 | 0.384 | -5.001 | 0.000 |
| Taiwan | PB | SES | -0.952 | 0.626 | -1.521 | 0.129 |
| Ukraine | PB | SES | -1.671 | 0.891 | -1.875 | 0.061 |
| Uruguay | PB | SES | 5.660 | 4.586 | 1.234 | 0.224 |
| United States | PB | SES | -1.804 | 0.379 | -4.755 | 0.000 |
| Venezuela | PB | SES | -1.267 | 2.010 | -0.630 | 0.530 |
| South Africa | PB | SES | -3.458 | 0.887 | -3.897 | 0.000 |
| *Note: PB = Prosocial Behaviour, SES = Socioeconomic status* | | | | | | |

### 3.3.2. Figure S4


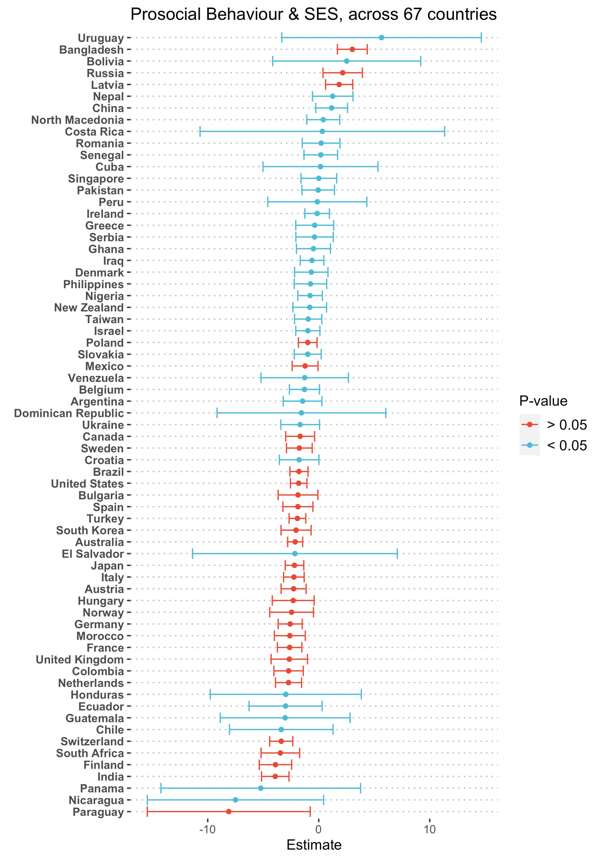


# 4. Cross Validations

## 4.1. All models

### 4.1.1. Table S8

| **Table S8 | Cross validation results (10-folds, 200 repetitions)** | | | | | | | | | | | | |
| --- | --- | --- | --- | --- | --- | --- | --- | --- | --- | --- | --- | --- |
|  | **Moral Identity** | | | **Morality-as-Cooperation** | | | **Moral Circle** | | | **Prosocial Behaviour** | | |
| *Model specification* | *RMSE* | *MAE* | *AIC* | *RMSE* | *MAE* | *AIC* | *RMSE* | *MAE* | *AIC* | *RMSE* | *MAE* | *AIC* |
| ~ 1 | 14.2 | 11 | 331202 | 11.6 | 8.92 | 315153 | 5.23 | 4.58 | 254064 | 35.6 | 30.1 | 416256 |
| ~ SES | 14.1 | 10.9 | 329968 | 11.5 | 8.90 | 314314 | 5.23 | 4.57 | 253533 | 35.4 | 30.3 | 414020 |
| ~ GINI | 14.1 | 10.8 | 330213 | 11.5 | 8.85 | 314739 | 5.22 | 4.56 | 253824 | 35.5 | 30.3 | 416116 |
| ~ SES + GINI | 14.0 | 10.8 | 329075 | 11.5 | 8.83 | 313934 | 5.21 | 4.56 | 253298 | 35.3 | 30.3 | 413916 |
| ~ SES * GINI | 14.0 | 10.8 | 329076 | 11.1 | 8.83 | 313925 | 5.21 | 4.56 | 253298 | 35.3 | 30.3 | 413917 |
| ~ SES + GINI + (1 | country) | 13.4 | 10.4 | 325705 | 11.1 | 8.51 | 311377 | 5.12 | 4.45 | 251935 | 34.1 | 29.1 | 411078 |
| ~ SES * GINI + (1 | country) | 13.4 | 10.4 | 325716 | 11.1 | 8.51 | 311379 | 5.12 | 4.45 | 251947 | 34.1 | 29.1 | 411086 |
| ~ SES + GINI + age + sex + (1 | country) | 13.3 | 10.3 | 324769 | 11.1 | 8.50 | 310551 | 5.09 | 4.41 | 250890 | 33.9 | 29.0 | 409759 |
| ~ SES * GINI + age + sex + (1 | country) | 13.3 | 10.3 | 324779 | 11.1 | 8.50 | 310554 | 5.09 | 4.41 | 250902 | 33.9 | 29.0 | 409768 |
| *Note: RMSE = Root Mean Square Error, MAE = Mean Absolute Error, AIC = Akaike Information Criterion* | | | | | | | | | | | | |
